# Supplementary material for: NCI-60 Whole Exome Sequencing and Pharmacological CellMiner Analyses
Source: PLoS One. 2014 Jul 17;9(7):e101670. doi: 10.1371/journal.pone.0101670 (PMC4102467; doi:10.1371/journal.pone.0101670)
Supplement: Table S3 — 19,940 Compounds included in the analysis. (XLSX) [file pone.0101670.s003.xlsx]

## Sheet: Sup Table 3
Footnotes:
a Cancer Chemotherapy National Service Center number.
b Food and Drug Administration
c A2, alkylating at N-2 position of guanine; A6, alkylating at O-6 of guanine; A7, alkylating at N-7 position of guanine; Ab, antibodies
; AM, antimetabolite; Ang, angioigenesis; Apo, apoptosis; CC, cell cycle; Db, DNA binder ; Df, antifols; Di, DNA incorporation; DNMT, DNA
methylttransferase inhibitor; Dr, ribonucleotide reductase inhibitor; Ds, DNA synthesis inhibitor; FT, Farnesel transferase inhibitor; GTPase
, Ras, Raf and other GTPases; HDAC, Histone deacetylase; HIF, hypoxia; Ho, hormone; IL, interleukin; Met, Met inhibitor; Mito, Mitochondria;
P90, hsp90 binder; PARP, Poly(ADP-ribose)polymerase; PI3K, PI3kinase; PKC, Protein kinase C; PD, Phosphodiesterase inhibitor; Pi,
protein synthesis inhibitor; Pr, protease/proteasome; ROS, reactive oxygen species; RP, radioprotectant; Rs, RNA synthesis inhibitor; RXR,
retinoic acid receptor; STK, serine/threonine kinase inhibitor; T1, topoisomerase 1 inhibitor; T2, topoisomerase 2 inhibitor; TGF, TGF beta; Tu,
tubulin-active antimitotic; XL, Crosslinking agent; YK, tyrosine kinase inhibitor.
d Identifier for PubChem http://pubchem.ncbi.nlm.nih.gov/.
	Supplemental Table 3: 19,940 Compounds included in the analysis
NSC # a	Compound name	FDA Status b	Mechanism of Action c	PubChem ID d
1	p-Benzoquinone, 2-methyl- (8CI)	-	-	66954
17	4-AMINO-3-PENTADECYLPHENOL	-	-	66970
89	.beta.-(Dimethylamino)propiophenone hydrochloride	-	Unknown	538184
185	.beta.-[2-(3,5-Dimethyl-2-oxocyclohexyl)-2-hydroxyethyl]glutarimide	-	Unknown	67121
295	2-Phenylbutyric Acid	-	-	67217
384	7-CHLORO-9-[[3-(DIPENTYLAMINO)PROPYL]AMINO]-1,2,3,4-TETRAHYDROACRIDINE, PHOSPHATE (3:2)	-	-	67299
534	ACETOXYPHENANTHRYLMERCURY	-	-	538225
596	3-BROMO-2,4,6-TRINITROTOLUENE	-	-	67492
629	Diepoxybutane	-	-	67525
721	GS 1752	-	-	67610
739	Aminopterin	-	-	67626
740	Methotrexate	FDA approved	Df	67627
742	Azaserine	-	-	538239
749	8-Azaguanine	-	Unknown	538242
752	Thioguanine	FDA approved	Ds	538243
755	Mercaptopurine	FDA approved	Ds	538245
757	Colchicine		Tu	67636
762	Mechlorethamine Hydrochloride	FDA approved	A7	538248
798	3-PHENYL-1-(2-PYRIDYL)-2-PROPEN-1-ONE	-	-	67675
830	4-Pyridineacrylic acid	-	-	67707
885	3,3'-DIAMINO-4,4'-BIS(DIMETHYLAMINO)BENZOPHENONE	-	-	67752
1010	7-[.ALPHA.-(P-NITROANILINO)BENZYL]-8-QUINOLINOL	-	-	67873
1011	P-[[.ALPHA.-(8-HYDROXY-7-QUINOLYL)BENZYL]AMINO]BENZOIC ACID	-	-	67874
1012	Anthranilic acid, N-[.alpha.-(8-hydroxy-7-quinolyl)benzyl]-	-	-	67875
1013	7-(.ALPHA.-ANILINO-P-NITROBENZYL)-8-QUINOLINOL	-	-	67876
1014	7-[.ALPHA.-[(4-METHYL-2-PYRIDYL)AMINO]BENZYL]-8-QUINOLINOL	-	-	67877
1026	Cycloleucine	-	-	67889
1027	2-Butanone, 1,1,3-tribromo-3-methyl-	-	Unknown	67890
1199	2-(ISOBORNYLOXY)-1,1-DIMETHYLETHYLAMINE	-	-	68044
1390	Allopurinol	FDA approved	AM	68199
1393	Pyrazoloadenine	-	-	68202
1433	4-(BUTYLAMINO)-1-PHENYL-1H-PYRAZOLO[3,4-D]PYRIMIDINE	-	-	68242
1460	INDAZOLE-3-ALANINE	-	-	538317
1482	2-(2-METHYL-2-NITROPROPOXY)BORNANE	-	-	68285
1507	2-CHLORO-3-PHENOXY-1,4-NAPHTHOQUINONE	-	-	68307
1760	3-PHENANTHRENEPROPIONIC ACID, HYDRAZIDE	-	-	68525
1771	Thiram	-	Unknown	68535
1797	o-Aato-amidoazotoluol(German)	-	-	68559
1895	Guanazole		A7	68625
1906	''522'' Rubber accelerator	-	Unknown	68634
1910	Alkarsodyl	-	-	538399
1945	GLUCONIC ACID, BARIUM SALT	-	-	538405
2013	Undecylenic Acid	-	-	68715
2039	Bioquin	-	-	68737
2053	TRIS(4-BIPHENYLYL)METHANOL	-	-	68748
2061	.beta.-2-Furylacrolein	-	-	68755
2186	Thymolphthalein	-	-	68872
2384	Cyclohexanone, 2,6-bis(phenylmethylene)- (9CI)	-	-	69055
2604	Chlorid di-n-butylcinicity (CZECH)	-	Unknown	69232
2626	Propyl Gallate	-	-	69249
2724	Benzene, 1-methyl-4-(phenylsulfonyl)- (9CI)	-	-	69335
2785		-	-	69386
2805	2,2',5,5'-Tetrahydroxy-4,4'-dimethylbiphenyl	-	-	69401
2829	Corps praline	-	-	69424
3039	Sodium Phenylacetate	-	-	538568
3053	Dactinomycin	FDA approved	Db	538571
3055	Puromycin	-	-	538572
3060	Arsenenous acid, potassium salt (9CI)	-	Unknown	538575
3061	Pyrimethamine	-	Unknown	69611
3062	Etoprine	-	-	69612
3073	Folic Acid	-	-	69619
3074	s-Triazine, 4,6-diamino-1-(p-chlorophenyl)-1,2-dihydro-2,2-dimethyl-, monohydrochloride (8CI)	-	-	538580
3077	s-Triazine, 4,6-diamino-1-(3,4-dichlorophenyl)-1,2-dihydro-2,2-dimethyl-, monohydrochloride (8CI)	-	-	538582
3080	s-Triazine, 4,6-diamino-1-(m-chlorophenyl)-1,2-dihydro-2,2-dimethyl-, monohydrochloride (8CI)	-	-	538585
3081		-	-	538586
3082	s-Triazine, 4,6-diamino-1-(m-bromophenyl)-1,2-dihydro-2,2-dimethyl-, hydrochloride (8CI)	-	-	538587
3083		-	-	538588
3088	Chlorambucil	FDA approved	A7	69624
3090	Gentian Violet	-	-	538591
3091	Ammonium, [.alpha.-[p-(dimethylamino)phenyl]-.alpha.-[4-(dimethyliminio)-2,5-cyclohexadien-1-ylidene]-p-tolyl]ethyldimethyl-, bromide, chloride (8CI)	-	-	538592
3093	Ammonium, (6-diethylamino-3H-xanthen-3-ylidene)diethyl-, chloride, iron(III) chloride deriv.	-	-	538594
3094	PDMT	-	-	69625
3262	Hydroquinone, 2,5-bis(1-aziridinyl)- (8CI)	-	-	69779
3265		-	-	69781
3284	Pyrrolidinium, 1,1'-ethylenebis[1-methyl-2-(3-pyridyl)-, dibromide (8CI)	-	-	538616
3298	Phenol, 2-methoxy-4-(2-nitropropenyl)-	-	-	69805
3424	Acridine, 9-(4-[bis(2-chloroethyl)amino]-1-methylbutylamino)-6-chloro-2-methoxy-, dihydrochloride	-	Unknown	538639
3531	Clioquinol	-	-	70003
3618		-	-	70066
3799		-	-	70232
3808	Benzene, 1-bromo-2,4-dinitro- (8CI9CI)	-	-	70240
3847		-	-	70274
3852	Hydron III	-	Unknown	70278
3877		-	-	538703
3905	.alpha.,.alpha.',.alpha.''-Tripyridyl	-	-	70320
3907	Benzoic acid, 2-hydroxy-, compd. with 8-quinolinol (1:1) (9CI)	-	-	70322
3927	Acetamide, N-(4,5-dihydro-4-methyl-5-oxo-1,2-dithiolo[4,3-b]pyrrol-6-yl)- (8CI9CI)	-	Unknown	70337
3941		-	-	70345
3970	Uracil	-	-	70371
4045	(Tetramethyldiamino)diphenylketoimine hydrochloride	-	-	538729
4060	.beta.-Ursolic acid	-	-	70455
4112	Fenticlor	-	-	70504
4114	Morpholine-N-dithiocarbamate	-	Unknown	70506
4170	Aquakay	-	Unknown	70547
4184	p,p'-Dihydroxystilbene	-	-	70559
4232		-	-	70590
4236	Benzenamine, N,N-dimethyl-4-[2-(4-quinolinyl)ethenyl]- (9CI)	-	-	70593
4238	Quinolinium, 2-(p-dimethylaminostyryl)-1-methyl--iodide	-	-	538770
4239	Quinolinium, 4-(p-dimethylaminostyryl)-1-methyl--iodide	-	Unknown	538771
4265	Phenanthroline hydrochloride	-	-	538778
4272	1,10-Phenanthroline, 5-methyl- (8CI9CI)	-	-	70618
4280	neo-Cuproin	-	Unknown	70625
4290		-	-	538782
4291	Masoprocol	-	-	70634
4320	.beta.-k-Strophanthin	-	-	70646
4375	Hydroxychloroquine Sulfate	-	-	70679
4378		-	-	538823
4434	Aizen Cathilon Orange RH	-	-	538841
4483	(1-Hydroxy-2-pyridinethione), sodium salt, tech.	-	-	538849
4512		-	-	70781
4518		-	-	70787
4623	1H-Imidazole-4,5-dicarboxylic acid, 2-phenyl- (9CI)	-	-	70885
4644	Betulin	-	-	70904
4698		-	-	70941
4722	Aloins	-	-	70965
4728	Aminothiadiazole	-	-	70971
4810		-	-	71037
4857	Carbamic acid, diethyldithio-, sodium salt (8CI)	-	Unknown	538917
4896	Alizarinbordeaux	-	-	538929
4911	Thioinosine	-	-	71103
4972	Tert-Butylhydroquinone	-	-	71164
5006	Benzenamine, 4-[(4-aminophenyl)(4-imino-2,5-cyclohexadien-1-ylidene)methyl]-2-methyl-, monoacetate (9CI)	-	-	71191
5011	Brilliant Green	-	-	538943
5019	Acid Leather Violet B	-	-	538951
5031	D-Glucopyranose, pentakis[3,4-dihydroxy-5-[(3,4,5-trihydroxybenzoyl)oxy]benzoate] (9CI)	-	-	538953
5048	p-Nitrphenylazo-.alpha.-naphthol	-	-	71216
5053	PTB	-	-	538958
5062	Allyl iodide hexamethylenetetramine	-	-	538960
5066	1,3-Benzenediol, 5-methyl-4-[(4-nitrophenyl)azo]- (9CI)	-	-	71231
5113	POMIFERIN	-	-	71273
5159	Antibiotic X-465A	-	-	538981
5192	5,6-Chrysenedione	-	-	71336
5200	Py 101	-	-	71342
5206		-	-	538985
5278	Benzene, 1,2,4-trichloro-3,5-dinitro- (8CI9CI)	-	-	71415
5283	Chlorotriethylstannane	-	-	71420
5332	PAN (indicator)	-	-	71465
5337	Lauryl pyridinium salt of 5-chloro-2-mercaptobenzothiazole	-	-	538994
5347	o-[(Carboxymethyl)thio]benzoic acid	-	-	71476
5355	Benzo[g]-1,3-benzodioxolo[5,6-a]quinolizinium, 5,6-dihydro-9,10-dimethoxy-, sulfate (2:1) (9CI)	-	Unknown	538997
5364	.alpha.-Quinidine	-	-	71489
5366	Noscapine	-	-	71491
5417	1-Naphthalenol, 4-nitroso- (9CI)	-	-	71540
5418	p-Nitroso-N,N-diethylaniline	-	-	71541
5425	9,10-Phenanthrenedione, 2-nitro- (9CI)	-	-	71548
5550	Malachite green oxalate	-	-	539028
5551	Naphtho(1,2-D)thiazolium, 2-(p-dimethylaminostyryl)-1-methyl-, iodide	-	-	539029
5620		-	-	71712
5639		-	-	539035
5648	Thonzonium Bromide	-	-	539037
5703		-	-	71791
5705		-	-	71793
5816	Benzamide, N-(p-chlorophenyl)thiocarbamoyl-	-	-	71861
5889	l-Usnic acid	-	-	71909
5890	D-Usnic acid	-	-	71910
5907		-	-	71916
6145		-	-	72139
6152	Chrysarobin	-	Unknown	72146
6171	Eucalyptol	-	-	72164
6176	(9S)-Cinchonan-9-ol	-	-	72169
6266	.omega.-Benzoylacetophenone	-	-	72255
6278	Naphtho[1,2-d]thiazol-2-amine (9CI)	-	-	72267
6386	Bialamicol Hydrochloride	-	-	539146
6396	Thiotepa	FDA approved	A7	72371
6777		-	-	72737
6814	.delta.13-cis-Docosenoic acid	-	-	72770
6883		-	-	72838
6891		-	-	72846
6926		-	-	72881
7215	Bis(2,4-diamino-5-methylphenyl)methane	-	-	73154
7223	Acid Chrome Black ethyl	-	Unknown	539189
7233		-	-	73166
7354	Purine, 6-hydrazino- (8CI)	-	-	539232
7359	Adenine xyloside	-	-	73250
7364	Metoprine	-	-	73253
7365	Diazooxonorleucine	-	-	539237
7390		-	-	73277
7420		-	-	73302
7436		-	-	73313
7519	BUPHANIDRINE, PERCHLORATE	-	-	539279
7521	[(6-Deoxy-.alpha.-L-mannopyranosyl)oxy]-14-hydroxybufa-4,20,22-trienolide	-	Unknown	73367
7525	Glucoproscillaridin A	-	-	73371
7529	Digitoxin	-	-	73375
7530	k-Strophanthoside	-	-	73376
7532	Adigal	-	-	539280
7533	Allocor	-	-	73378
7534	SCILLIROSIDIN, GLYCOSIDE	-	-	73379
7535	Card-20(22)-enolide, 3-[(O-.beta.-D-glucopyranosyl-(1.fwdarw.4)-O-3-O-acetyl-2,6-dideoxy-.beta.-D-ribo-hexopyranosyl-(1.fwdarw.4)-O-2,6-dideoxy-.beta.-D-ribo-hexopyranosyl-(1.fwdarw.4)-2,6-dideoxy-.b	-	-	539281
7606	Alantan	-	-	73440
7757	Bornyl cinnamate	-	-	73553
7801	Aniline violet (component of)	-	-	539338
7811	Ammonium, [4-[[p-(dimethylamino)phenyl]imino]-2,5-cyclohexadien-1-ylidene]dimethyl-, chloride (8CI)	-	-	539343
7813	Brilliant Cresyl Blue	-	-	539345
7821	[6-(Dimethylamino)-3H-phenoxazin-3-ylidene]dimethylammonium chloride	-	-	539351
7833	Acetate Red Violet R	-	-	539357
7853	Purine, 2,6-dichloro-7-methyl- (8CI)	-	-	73619
8101	Inositol	-	-	73813
8120	(2,4-Dihydroxy-2H-pyran-3(6H)-ylidene)acetic acid, 3,4-lactone	-	-	91264
8174	Biguanide, 1-phenyl-, compd. with 2-benzothiazolethiol (1:1) (8CI)	-	-	73873
8179		-	-	73878
8552		-	-	74236
8673	Heptamethyl-p-rosaniline chloride	-	-	539486
8675	Basic Violet 4	-	Unknown	539488
8704	Iodoquinol	-	-	74322
8786	Ba 2726	-	Unknown	74402
8806	Melphalan	FDA approved	A7	568198
8974		-	-	539505
8982		-	-	539513
8985	Di-p-tolyliodinium bromide	-	-	539516
8995	Atul Oil Red G	-	-	539521
9037		-	-	74626
9168	Amebacilin	-	-	74694
9170	Benzo[a]heptalen-9(5H)-one, 7-amino-6,7-dihydro-1,2,3-trimethoxy-10-(methylthio)-, (S)- (9CI)	-	-	74695
9291	Benzo[a]phenazoxonium, 9-(dimethylamino)-, chloride	-	Unknown	539601
9358	p-(2-Pyridylazo)dimethylaniline	-	-	74856
9403	C.I. Basic Green 5 (VAN)	-	-	539618
9404	C.I. Basic Violet 5 (8CI)	-	-	539619
9594	C.I. Basic Violet 5 (8CI)	-	-	539646
9598	Azur I	-	-	539647
9605	C.I. Basic Blue 24 (VAN)	-	-	539650
9608	1-(naphthalen-2-yl)-9,10-dioxo-9,10-dihydroanthracene-2-carboxylic acid	-	-	75051
9609	Ammonium, [m-[[4-[(2-hydroxy-1-naphthyl)azo]-o-tolyl]azo]phenyl]trimethyl-, chloride (8CI)	-	-	539653
9610	Aizen Cathilon Grey BLH	-	-	539654
9612	Benzo[a]phenazoxonium, 5-(benzylamino)-9-(diethylamino)-, chloride (8CI)	-	-	539656
9665	Alcohol-I from fumagillin	-	-	75071
9704	Therapeutic Progesterone	-	-	75083
9706	Triethylenemelamine	FDA approved	A7	75085
9768		-	-	75144
9853	.beta.-Naphthol Orange	-	-	539726
9855	C.I. 50200	-	-	539727
9856	.delta.9-cis-Oleic acid	-	-	75221
9858	Astrazon Fuchsine GN	-	Unknown	539728
9921	Pentamidine	-	-	75273
9936	p-Isopropylbenzaldehyde thiosemicarbazone	-	-	75287
10010	N,N-Bis(2-methyl-6-methoxy-4-quinaldyl)-1,9-diamino- nonane Dihydrochloride Hydrate	-	-	539757
10018	1H-Benzimidazole, 1-dodecyl-2-methyl-, monohydrobromide	-	-	539760
10036		-	-	75363
10037		-	-	75364
10438	Azoresorcin	-	Unknown	75737
10460	p-Fuchsin	-	-	539808
10466	Aizen Magenta	-	-	539813
10483	Therapeutic Hydrocortisone	-	-	539824
10517	A-7	-	-	539849
10520		-	-	539852
10526		-	-	539858
10587	1-Naphthalenemethanol, .alpha.-[2-(dibutylamino)-1,1-dimethylethyl]-4-methoxy-, hydrochloride (8CI)	-	-	539888
10641		-	-	539911
10660		-	-	539920
10721	Cortef fluid	-	-	75847
10848		-	-	75956
11051		-	-	76102
11216	Indophenol, 2,6-dibromo-, monosodium salt	-	-	540032
11225	Basic Blue 17	-	Unknown	540036
11232	Anisole-2-azo-.beta.-naphthol	-	Unknown	76266
11235	Acronol Lake Yellow T	-	-	540039
11240	Aizen Victoria Blue BOH	-	-	540042
11241	C.I. Basic Red 6	-	-	540043
11420		-	-	76420
11461	Carbamic acid, dimethyldithio-, 2,4-dinitrophenyl ester (8CI)	-	-	76444
11511		-	-	76457
11590		-	-	540144
11624		-	-	76520
11663		-	-	76551
11667		-	-	76553
11668	N4,N6-bis(3-chlorophenyl)-1-methyl-1H-pyrazolo[3,4-d]pyrimidine-4,6-diamine	-	-	76554
11713	C.I. Pigment Red 64 (8CI)	-	-	76587
11773	(Methylimino)diacetic acid	-	-	76627
11841		-	-	76684
11881	Benzoyl leuco methylene blue	-	-	76712
11897	Phthiocol	-	-	76726
11905	Bethabarra Wood	-	-	76734
11926	Aristolochic acid	-	Unknown	76752
11981		-	-	76777
11991		-	-	76787
12097	Resorufin	-	Unknown	76883
12113	Benzene, 1,2-dimethoxy-4-(2-nitro-1-propenyl)- (9CI)	-	-	76892
12129		-	-	76905
12150	Decanediamide, N,N'-bis(4-amino-2-methyl-6-quinolyl)-, dihydrochloride	-	Unknown	540255
12161	Adenosine, 1,2-dihydro-2-oxo- (9CI)	-	-	76920
12174	.DELTA.-Fluorocortisone	-	-	76932
12181		-	-	540266
12198	Dromostanolone Propionate	FDA approved	Ho	76938
12455	Acid Alizarin Red B	-	Unknown	540311
12516	4-(6-Chloro-2-methoxyacridin-9-ylamino)-2-(pyrrolidin-1-ylmethyl)phenol, hydrochloride	-	-	540339
12517		-	-	540340
12650	ANTINEOPLASTIC-12650	-	-	77304
12825		-	Unknown	77470
12865	Quinine, hydrobromide, hydrate	-	-	77493
13002	Acridine, 9-(p-dimethylaminoanilino)-	-	-	77578
13006	Ethanol, 2-[(2-[(2-methoxy-9-acridinyl)amino]ethyl)amino]-, dihydrochloride	-	-	540403
13051		-	-	77606
13052		-	-	77607
13055		-	-	540422
13119	L-Tryptophan (9CI)	-	-	77648
13128	.beta.-Pyridinecarboxamide	-	-	77656
13151		-	-	77676
13162		-	-	540453
13204		-	-	77709
13239		-	-	77738
13248		-	-	77746
13275		-	-	540487
13300		-	-	77783
13307	9-Phenanthrenemethanol, 6-bromo-.alpha.-[(diheptylamino)methyl]-, hydrochloride (9CI)	-	-	540496
13314		-	-	77787
13316	(2-(4-chlorophenyl)quinolin-4-yl)(piperidin-2-yl)methanol	-	-	77789
13317		-	-	77790
13318		-	-	77791
13378		-	-	540517
13380	2-(6-Methoxy-2-methylquinolin-4-ylthio)benzo[d]thiazole	-	-	77838
13397	Triamcinolone	-	-	77851
13477		-	-	540537
13479		-	-	77916
13480		-	-	540538
13483		-	-	77917
13484		-	-	77918
13502	Antibiotic C638-8, crystalline	-	-	540556
13597		-	-	540565
13598		-	-	78006
13616	2-N-Cyclohexyl-1-N-(6-methoxyquinolin-8-yl)butane-1,2-diamine	-	-	78018
13625		-	-	78021
13628		-	-	78024
13699		-	-	78082
13713		-	-	540594
13801	o-Acetanisidide, 2-mercapto-, carbamate	-	-	78167
13831		-	-	78191
13835		-	-	540615
13973	Acridine yellow	-	-	540666
13977	Alizarin Blue S	-	-	540667
13981	Benzamide, N-(5-amino-1-anthraquinonyl)- (8CI)	-	-	78246
13984		-	-	78248
13986	C.I. 11050	-	-	540671
14006		-	-	78263
14022	Bis(methylthio)maleonitrile	-	-	78277
14034		-	-	78288
14040		-	Unknown	78294
14050	Chloroquine Phosphate	-	Unknown	78301
14079	Acridine, 9-[(4-diethylamino-1-methylbutyl)amino]-2-methoxy-6-methyl-, dihydrochloride	-	-	540695
14186		-	-	78416
14229	Quinacrine Hydrochloride	FDA approved	Db	301135
14380		-	-	78575
14548		-	-	78716
14666	Adenine	-	-	540768
14711		-	-	540771
14741		-	-	540778
14973	N-(p-Carboxyphenyl)glycine	-	-	78960
14974	Glaucarubol	-	-	78961
14975	Glaucarubin	-	-	78962
14977		-	-	540846
15013	ANQI	-	-	540851
15078	Malononitrile, (.beta.-pentylcinnamylidene)-	-	-	79034
15193	D-arabino-Hexose, 2-deoxy- (8CI 9CI)	-	-	79125
15200	Gallium Nitrate	-	-	540896
15309	2,5-Cyclohexadiene-1,4-dione, 2,5-dimethyl- (9CI)	-	-	79218
15372	p-(.beta.-Naphthylamino)phenol	-	-	79275
15609	Gluconic acid, cyclic antimonate(III), sodium salt	-	-	540977
15623		-	-	540991
15628	Anaprel	-	-	79429
15791	Thioxanthen-9-one, 4-methyl-1-(2-piperidinoethylamino)-, hydrochloride	-	-	541009
15795		-	-	541013
15812		-	-	541020
15886		-	-	79647
15975	Brilliant Tangerine 13030	-	-	79689
16116		-	-	541061
16166	Azure B bromide	-	-	541068
16219		-	-	79885
16222	Phenazinium (8CI), 3-(diethylamino)-7-[(2-hydroxy-1-naphthyl)azo]-5-phenyl-,chloride	-	-	541074
16258		-	-	79910
16520		-	-	80076
16685		-	-	80198
16729		-	-	80241
16865		-	-	541179
16876		-	-	80372
17061		-	-	80477
17065		-	-	80481
17245		-	-	80607
17257	Acti-dione benzoylacetate	-	-	80618
17273	Acridine, 9-[[3-[bis(2-chloroethyl)amino]propyl]amino]-6-chloro-2-methoxy-, dihydrochloride (8CI)	-	-	541256
17275		-	-	541258
17473	Flumazin	-	-	541291
17551	1,3-Propanedione, 1-(3-pyridinyl)-3-(2,4,6-trimethyl- phenyl)-	-	-	80844
17744		-	-	80998
17759		-	-	81013
17762		-	-	81016
18286		-	-	81397
18298		-	Unknown	81406
18300		-	-	81407
18335	Antibiotic MA 144B2	-	-	548929
18451		-	-	81486
18460		-	-	81495
18613		-	-	541471
18719		-	-	81731
18727		-	-	541477
18758		-	-	81763
18804	.beta.-Isopropyltropolon	-	Unknown	81803
18805	.gamma.-Thujaplicin	-	Unknown	81804
18877	3,4-di(benzo[b]thiophene-3-carbonyl)-1,2,5-oxadiazole 2-oxide	-	-	81834
18880		-	-	81837
18883		-	-	81840
18891		-	-	81848
18894	.alpha.-Piperidone	-	-	81850
19048	Racemic gossypol, acetate salt	-	-	81992
19139		-	-	82071
19147	2-chloro-N-phenethyl-9-phenyl-9H-purin-6-amine, hydrochloride	-	-	541525
19441	Pteridine-2,4-7-triamine, 6-(2-methylphenyl)-	-	-	82358
19509	Yohimban-16.alpha.-carboxylic acid, 17.alpha.-hydroxy-, methyl ester, monohydrochloride (8CI)	-	-	541567
19630	(2,5-dioxo-2,5-dihydro-1H-pyrrol-1-yl)methyl propionate	-	-	82475
19637	2-(m-Nitrostyryl)pyridine	-	-	82482
19639	m-Dimaleimidobenzene	-	-	82484
19645	4-Nitroquinoline-1-Oxide	-	-	541575
19727		-	-	82556
19728		-	-	82557
19760		-	-	82569
19781		-	-	82585
19802	.beta.-Rhamnocitrin	-	-	82596
19893	Fluorouracil	FDA approved	Ds,Rs	82653
19912	Cryptopleurine	-	-	82656
19942	Tenulin	-	-	82679
19976		-	-	82697
19987	Methylprednisolone	-	-	82706
19990	Dalacin C (Antibiotic 101a-3)	-	-	82709
20000	(Cyanoguanidino)methylmercury	-	-	541693
20200	Benzethonium Chloride	-	Unknown	541724
20207		-	-	541729
20256	Uridine	-	-	82889
20514		-	-	83111
20527	component of ASC-4	-	-	83122
20534	Thioxanthen-9-one, 1-[[2-[ethyl(2-hydroxyethyl)amino]ethyl]amino]-4-methyl-,hydrochloride	-	-	541768
20644		-	-	83202
20909	n-Dodecylisoquinolinium bromide	-	-	541835
21061	o(m And p)-Cresol	-	-	83536
21075	Pilocercine	-	-	83542
21206	6-Aminonicotinamide	-	Unknown	83630
21276	Benzene, 2-chloro-1,3-dinitro- (8CI9CI)	-	-	83677
21434		-	-	83797
21518		-	-	83874
21545	Methanesulfonothioic acid, S-methyl ester (9CI)	-	-	83893
21548	Thymidine	-	-	83895
21588		-	-	83916
21622		-	-	83947
21662		-	-	83974
21666	Phenazine di-N-oxide	-	-	83978
21669	Phenazine (8CI 9CI), 2-methoxy-, 5,10-dioxide	-	-	83980
21681		-	-	83992
21683		-	-	83994
21702		-	-	541963
21715		-	-	84010
21728	Sempervirine, nitrate	-	-	541970
21914	3,4-Benzpyrene	-	-	84204
21970	L-alpha-Aminobutyric Acid	-	-	84258
22070	Chrysanthin	-	-	541984
22201	Mercury, (1,2,3,4,7,7-hexachlorobicyclo[2.2.1]hept-2-ene-5,6-dicarboximido)phenyl-	-	-	542020
22225		-	-	542029
22348	1H-Naphth[2,3-d]imidazole-4,9-dione, 1-(4-bromophenyl)-2-methyl-	-	Unknown	84524
22709	v-Triazolo[4,5-d]pyrimidin-7-ol	-	Unknown	301139
22842	Coumestrol	-	-	84879
22945	Benzene, 1,2-dichloro-4,5-dinitro- (8CI9CI)	-	-	84952
22984		-	-	84981
23159		-	-	85109
23162	Nandrolone Phenpropionate	FDA approved	Ho	85111
23173		-	-	85116
23297		-	-	85221
23345	Hydrazinecarbothioamide, 2,2'-(1-methyl-1,2-ethanediylidene)bis[N-methyl- (9CI)	-	-	85260
23416		-	-	85311
23418		-	-	542265
23477		-	-	85351
23615	Deoxyribose uracil	-	-	85466
23759	Testosterone	FDA approved	Ho	-
23766	6-N-[2-[5-(diethylamino)pentan-2-ylamino]-6-methylpyrimidin-4-yl]-2-methylquinoline-4,6-diamine trihydrochloride	-	-	542316
23833		-	-	85605
23856		-	-	85624
23863		-	-	85627
23904		-	-	542334
23925		-	-	542343
23936		-	-	85677
23994	Butyl maleurate	-	-	85723
24030	p-Phenylenediamine (8CI), N-butyl-N'-phenyl-	-	-	85758
24037	N-(9-(4-(trimethylamino)benzylidene)-9H-fluoren-2-yl)acetamide, iodide salt	-	-	542353
24047		-	-	542356
24076		-	-	542360
24113		-	-	85795
24189		-	-	85861
24500	p-Benzoquinone, 2,6-dimethoxy- (8CI)	-	-	85942
24559	Plicamycin	FDA approved	Rs	85982
24692		-	-	86047
24817	.alpha.-Peltatin	-	-	86162
24818	Furo[3',4':6,7]naphtho[2,3-d]-1,3-dioxol-6(5aH)-one, 5,8,8a,9-tetrahydro-9-hydroxy-5-(3,4,5-trimethoxyphenyl)-, [5R-(5.alpha.,5a.beta.,8a.alpha.,9.alpha.)]- (9CI)	-	-	86163
24819	.alpha.-Peltalin A (8CI)	-	-	86164
24871	l-Arctigenin	-	-	86207
24913		-	-	86245
25028	1,2-Naphthalenedione, 4-amino- (9CI)	-	-	86348
25154	Pipobroman	FDA approved	A7	86412
25454		-	-	86633
25485	g-Strophanthin	-	-	86662
25703		-	-	86787
25818	Benzene, 1-chloro-4-(methylsulfonyl)-2-nitro- (9CI)	-	-	86863
25830		-	-	86875
25846		-	-	86891
25861		-	-	542622
26037		-	-	86977
26040	1-Piperidineethanol, .alpha.-[p-(p-chlorostyryl)phenyl]-	-	-	86979
26045	Indole-2,3-dione, 5,7-dichloro- (8CI)	-	-	86984
26074		-	-	87011
26081		-	-	542658
26113		-	-	87037
26258	Rotenone	-	-	87142
26271	Cyclophosphamide	FDA approved	A7	87150
26273	6-Benzylthioinosine	-	-	87152
26427		-	-	87293
26540	Pyrimidine, 4,5,6-trichloro-2-methyl-	-	Unknown	87401
26647	Naphthazarin	-	-	87461
26692	4,5-bis(4-Methoxyphenyl)-1H-imidazol-2(5H)-one	-	-	87501
26697		-	Unknown	87505
26821	o-Aminoazotoluene	-	-	87573
26933		-	-	87638
26980	Mitomycin	FDA approved	A2	87663
27034	2,3-Quinizarindicarbonitrile	-	-	542841
27445		-	-	87918
27515	2-Isoindolineacetic acid, .alpha.-isopropyl-1,3-dioxo- (8CI)	-	-	87954
27604		-	-	88012
27607		-	-	88014
27640	Floxuridine	FDA approved	Ds	88034
28002	Naphtho[2,1-b]quinolizinium, 7-methyl- chloride	-	-	543027
28081		-	-	88275
28365		-	-	88387
28408		-	-	543102
28527		-	-	88503
28608		-	-	88559
29013		-	-	88804
29018		-	-	88809
29117		-	-	88894
29182		-	-	88958
29228	Diallyl Disulfide	-	Unknown	88992
29422	Guanosine, 6-thio- (9CI)	-	-	89020
29424		-	-	543238
29443		-	-	543246
29459	Quinoline, 4-[.alpha.-[bis(2-chloroethyl)amino]-4-methoxy-m-toluidino]-7-chloro-, dihydrochloride	-	-	543249
29603		-	-	543257
29604		-	-	543258
29606		-	-	543260
29630	Dichloromethotrexate	-	-	89195
29638		-	-	89200
29865		-	-	89320
30198		-	-	543382
30637		-	-	543454
30652	1,4-Diacetoxynaphthalene	-	-	89787
30656	p,p'-Bis(dimethylamino)thiobenzophenone	-	-	89791
30706	p-Benzoquinone, 2,5-bis(1-aziridinyl)- (8CI)	-	-	89833
30712		-	-	89839
30722	Pyrimidine, 2,4,6-trichloro-5-methyl-	-	-	89849
30799		-	-	89901
30813		-	-	89914
30863		-	-	89959
30915		-	-	543512
30916	p-Dioxane, 2,5-bis[(benzoyloxymercuri)methyl]-	-	-	543513
30930		-	-	89998
31059		-	-	90116
31660		-	-	90472
31703		-	-	90501
31709	Quinolinium, 2-[2-(2,5-dimethyl-1-pentyl-1H-pyrrol-3-yl)ethenyl]-1,6-dimethyl-, chloride	-	-	543583
31717	p-Benzoquinone, tetrakis(1-aziridinyl)-	-	-	90509
31760	Asperuloside	-	-	90543
31768		-	-	543601
31777		-	-	543605
31780	Acronol Phloxine FF	-	-	543608
31812	component of Sultrin	-	-	90559
31815	ANTINEOPLASTIC-31815	-	-	543610
31869	Coumarin, 7-methoxy-6-(3-methyl-2-butenyl)- (8CI)	-	-	90603
31882	Chrysin, 3,4'-dimethoxy-	-	-	90616
32065	Hydroxyurea	FDA approved	Dr	90752
32190	WLN: T66 BNJ G1R& JQ	-	-	90837
32212	.alpha.-Bromochalcone	-	-	90851
32569	Piperazine, 4-(m-chlorophenyl)-4'-(p-chlorophenyl)-1,1'-trimethylenedi-	-	-	91012
32743	Acetoxycycloheximide	-	-	91151
32924		-	-	543839
32930		-	-	543844
32937	Acridan, 9-chloro-9-(p-dimethylaminophenyl)-10-ethyl-, dihydrochloride	-	-	543849
32942	Cetalkonium Chloride	-	-	543854
32944	Emetan-6'-ol, 7',10,11-trimethoxy-, dihydrochloride (9CI)	-	Unknown	543856
32946	Mitoguazone Dihydrochloride	-	-	543857
32951	Acetic acid, (2,4-dihydroxy-2H-pyran-3(6H)-ylidene)-, 3,4-lactone	-	-	73831
32967		-	-	543869
32982	Curcumin	Clinical trial	Apo	91276
32992	Benzo[a]heptalen-9(5H)-one, 7-acetamido-1-(glucosyloxy)-6,7-dihydro-2,3,10-trimethoxy-	-	-	91282
33001	Fluorometholone	-	-	91286
33006		-	-	91291
33052		-	-	91336
33092		-	-	91372
33202		-	-	543911
33353		-	-	91531
33408	Acetamide, N-(3-hydroxy-2-iodo-9,10,11-trimethoxy-5H-dibenzo[a,c]cyclohepten-5-yl)-, (S)- (9CI)	-	-	91560
33410	Benzamide, N-(5,6,7,9-tetrahydro-1,2,3,10-tetramethoxy-9-oxobenzo[a]heptalen-7-yl)-, (S)- (9CI)		Tu	91562
33418		-	-	543937
33419	NCI 1528	-	-	543938
33434	Isoquinolinium (8CI), 2,2'-decamethylenedi-, dibromide	-	-	543948
33458		-	-	543959
33530		-	-	91630
33548	.beta.-Dimethylamino-.alpha.-phenylpropiophenone hydrochloride	-	-	543989
33556		-	-	543995
33560		-	-	543998
33566		-	-	544004
33568	Propiophenone, 2-phenyl-3-piperidino- (8CI)	-	-	91644
33570		-	-	91645
33574		-	-	544008
33577		-	-	544010
33669	Emetine Hydrochloride	-	Unknown	544052
33762		-	-	91779
33765	CAP 1 hydrochloride	-	-	544065
33832	Ascorbic Acid	-	-	91803
34046		-	-	91900
34060		-	-	544115
34391	Cryptocyanin	-	-	544284
34444		-	-	92062
34462	Uracil Mustard	FDA approved	A7	92079
34475	Androst-5-en-16.beta.-ol, 3.beta.-methoxy- (8CI)	-	-	92092
34521	Dextromethorphan Hydrobromide	FDA approved	Ho	92119
34533	Fulcin	-	Unknown	92124
34656	CYTISINE, 3-METHYL-	-	-	92179
34661	N-Methylphenazinium methosulfate	-	-	544380
34749		-	-	544437
34757	Melicopidine	-	Unknown	92214
34780		-	-	92228
34821	2-Propen-1-one, 2-[(dimethylamino)methyl]-1-(2-nitro phenyl)-, hydrochloride	-	-	544456
34864		-	-	92276
34924		-	-	544502
34927		-	-	544504
34931	1-Naphthalenesulfonic acid, 3,3'-[1,2-ethenediylbis [(3-sulfo-4,1-phenylene)azo]]bis[4-hydroxy-, tetrasodium salt	-	Unknown	544508
34949		-	-	92303
35049		-	-	92366
35123	Pyrimidine, tetrachloro- (8CI9CI)	-	Unknown	92386
35400		-	-	92511
35427		-	-	544592
35441	Phenanthridinium, 8-amino-5-methyl-6-phenyl-, bromide (9CI)	-	-	544604
35446	PROPIOPHENONE, 3-PHENYL-3-PIPERIDINO-	-	-	92529
35450	1-[2-(biphenyl-4-yl)-2-oxoethyl]-3,5,7-triaza-1-azoniatricyclo[3.3.1.13,7]decane iodide	-	-	544609
35468	Podophyllotoxin bromide	-	-	92534
35471	.alpha.-Peltalin A (8CI)	-	-	92536
35479	Podophyllotoxin isothiuronium bromide	-	-	544630
35489		-	-	544635
35542	Xanthoxyletin	-	-	92564
35580		-	Unknown	92596
35587	Benzenesulfonic acid, 4-amino-, compd. with 1-[(2-diethylamino)ethyl]amino]-4-methyl-9H-thioxanthen-9-one (1:1) (9CI)	-	-	92603
35617	1,3-Naphthalenedisulfonic acid, 7,7'-azoxybis [[[[[(2-sulfo-4,1-phenylene-2,1-ethenediyl)-3-sulfo-4,1- phenylene]azo]-4,1-phenylene]azo]bis-, octasodium salt	-	Unknown	544692
35676	Purpurogallin	-	-	92636
35729		-	-	92650
35753	Pyrocatechol, 4,4'-(meso-1,2-diethylethylene)di-	-	-	92665
35767	Allyl 2,4,6-tribromophenyl ether	-	-	92675
35770	Clomiphene Citrate	-	-	92678
35790	1H-Benzimidazole-2-propanoic acid	-	-	92688
35915	meso-2,3-Butanediol, 1,4-bis(1-aziridinyl)-	-	-	92756
35949		-	-	92787
35950	Carbamimidothioic acid, (4-chloro-1-naphthalenyl)methyl esterwith Phenol, 2,4-dinitro-	-	-	92788
36333	Acridine, 6,9-diamino-2-ethoxy-, lactate	-	-	93052
36338	Myristyl-.gamma.-picolinium chloride	-	-	544886
36354	Benzo[a]heptalen-9(5H)-one, 7-amino-6,7-dihydro-1,2,3,10-tetramethoxy-, (S)-, [R-(R*,R*)]-2,3-dihydroxybutanedioate (1:1) (9CI)	-	-	93060
36369		-	-	544905
36373	Naphtho[2,3-d]-1,3-dioxole-6,7-dimethanol, 5,6,7,8-tetrahydro-5-hydroxy-8-(3,4,5-trimethoxyphenyl)-, higher melting isomer	-	-	93070
36390	Podophyllin	-	-	544917
36405	Chelerythrine hydrochloride	Clinical trial	PKC,STK	544923
36407	Picropodophyllin	-	-	93086
36413	Dauricine (8CI)	-	-	93089
36437	CRASSIN, ACETATE	-	-	93110
36525	8-[(4-tert-butylphenoxy)methyl]-1,3-dimethyl-3,7-dihydro-1H-purine-2,6-dione	-	-	93147
36731	Sulfiram	-	Unknown	93296
36758		-	-	93312
36768		-	-	93314
36806		-	Unknown	93334
37168	Acco Naphthol AS-BS	-	-	93615
37186		-	-	93628
37187	Acco Naf-Sol AS-KB	-	-	93629
37202	Acco Naphthol AS-BO	-	-	93643
37364	O6-Methylguanine	-	Unknown	545213
37379		-	-	93748
37388		-	-	545223
37432	2-Propen-1-one, 3-(2-hydroxyphenyl)-1-phenyl- (9CI)	-	-	93789
37433		-	-	93790
37518		-	-	93853
37608	C.I. Azoic Coupling Component 27	-	-	93926
37627	Anthraquinone, 1,5-diphenoxy- (8CI)	-	-	93944
37641	Pregn-1,4-diene-3,20-dione, 9-fluoro-11.beta.,16.alpha.,17,21-tetrahydroxy-,cyclic 16,17-acetal with acetophenone (8CI)	-	-	93957
37815		-	-	94053
37943	Nicotinaldehyde, phenethyloxime	-	-	94124
38007		-	-	94165
38086		-	-	94239
38087		-	-	94240
38090		-	-	94242
38186	Mercury, (p-dioxane-2,5-diyldimethylene)bis[(octanoyloxy)-	-	-	545342
38270	A 64922	-	-	545361
38525		-	-	545413
38530		-	-	545417
38534	Cyclohexanone, 2-[(dimethylamino)methyl]-6-(piperidinomethyl)-, dihydrochloride	-	Unknown	545421
38535	Cyclohexanone, 2,6-bis(4-morpholinylmethyl)-,dihydrochloride	-	-	545422
38643	Acetylenedicarboxamide (8CI)	-	Unknown	94532
38663	Benzene, 1,2-dichloro-4-(2-nitroethenyl)- (9CI)	-	-	94538
38684	1,3-Dioxane, 5,5-dimethyl-4-(1-methylethyl)-2- (2-phenylethenyl)-	-	-	94550
38721	Mitotane	FDA approved	Ho	94579
38732		-	-	545443
38733		-	-	545444
38737	Purine, 2-amino-6-(O-nitrobenzylthio)-	-	-	545448
38743		-	-	94591
38777		-	-	94622
38887	Aminoazathioprin	-	-	545461
39084	Azathioprine Sodium	-	-	545491
39135		-	-	94885
39147	Glutarimide, 3-[2-hydroxy-2-(5-hydroxy-3,5-dimethyl-2-oxocyclohexyl)ethyl]-,(-)- (8CI)	-	Unknown	94897
39199		-	-	94920
39202	Cyclohexanone, 2,6-bis(piperidinomethyl)-	-	Unknown	94922
39215		-	-	545524
39277		-	-	94974
39310	Naphtho[1,2-b]quinolizinium, 13-methyl-, chloride	-	-	545546
39351		-	-	95006
39367	9H-Purine, 6-(allylthio)-9-.beta.-D-ribofuranosyl- (8CI)	-	-	95020
39368	SRI 1215	-	-	95021
39661	Idoxuridine	-	-	95181
39688	Benzeneethanamine, .alpha.-methyl-N-(1-methylethyl)-, hydrochloride (9CI)	-	-	545619
39779		-	-	95209
39789		-	-	545637
39792	Methanone, 2,3-oxiranediylbis[phenyl- (9CI)	-	-	95218
39803	2-Propen-1-one, 3-(1-naphthalenyl)-1-phenyl- (9CI)	-	-	95226
39851		-	-	545649
39863		-	-	95276
39969		-	-	95367
40273		-	-	95526
40341	1,4-Naphthalenedione, 2,2'-(1,4-piperazinediyl)bis[3-chloro-	-	-	95571
40342		-	-	95572
40593	Pyrimidine, 2,4,5-trichloro-	-	Unknown	95769
40618	Cyclohexanone, 2,6-bis(phenylmethylene)- (9CI)	-	-	95789
40665	PC 254	-	-	95821
40693	Cadmium, bis(2-amino-2-methyl-1-propanol-N,O)dichloro-	-	-	545919
40787		-	-	95896
40837	Ethane-1,2-diphosphonic acid	-	-	95938
41390	ANTINEOPLASTIC-41390	-	-	96290
41566	Ethyl phenylacetylenecarboxylate	-	-	96387
41567		-	-	96388
41805	Avicocid	-	-	96536
41890	.alpha.(1),.alpha.(4)-Dichlorodurene	-	-	96590
42044	Lobendazole	-	-	96715
42070		-	-	96741
42076	.beta.-D-Glucopyranoside, 5,5a,6,8,8a,9-hexahydro-6-oxo-5-(3,4,5-trimethoxyphenyl)furo[3',4':6,7]naphtho[2,3-d]-1,3-dioxol-9-yl, [5R-(5.alpha.,5a.beta.,8a.alpha.,9.alpha.)]-	-	-	96745
42138	KC 60	-	-	96795
42258		-	-	546216
42352	Carbamic acid, (2-piperazinylethyl)dithio-	-	-	96953
42369		-	-	96967
42371		-	-	96968
42384	9-benzyl-6-(benzylthio)-9H-purin-2-amine	-	-	96980
42405		-	-	96990
42428		-	-	97002
42656		-	-	97198
42679		-	-	97221
42695		-	-	97237
42797		-	-	97334
42808		-	-	97345
42824		-	-	97361
42856		-	-	97386
42972		-	-	97474
43101		-	-	97592
43308		-	-	97763
43321	.beta.-D-Glucopyranoside, 3-hydroxy-5-[2-(3-hydroxy-4-methoxyphenyl)ethenyl]phenyl (9CI)	-	-	97776
43333	p-Benzoquinone, trimethoxy-	-	-	97788
43339	Nootkatin	-	-	97793
43409		-	-	97861
43413		-	-	97865
43486	Aporphine-2,11-diol, 10-methoxy-, hydrochloride (8CI)	-	-	546330
43534		-	-	97947
43567	Coumarin, 6-hydroxy-7-methoxy-4-methyl- (8CI)	-	-	97973
43578		-	-	97984
43628	Copper, [phthalocyaninato(2-)]-, polymers	-	-	546391
43675	Brestanol	-	-	98038
43959	Benzophenone, 4,4'-bis(dimethylamino)-, oxime	-	-	98240
44102		-	-	98325
44185	Bismuth, triiodo(6',7',10,11-tetramethoxyemetan)-	-	-	98401
44230		-	Unknown	98445
44477		-	-	98586
44489		-	-	546505
44580	PC 287	-	-	98666
44585	PC 298	-	-	98671
44684		-	-	546539
44690	Ammonium, (6-diethylamino-3H-xanthen-3-ylidene)diethyl-, chloride	-	Unknown	546540
44753		-	-	98804
45029	1,4-Naphthoquinone, 2-chloro-3-furfurylamino-	-	-	98967
45074		-	-	98998
45114		-	-	99029
45182		-	-	546611
45236		-	-	99076
45238		-	-	99078
45291		-	-	99097
45384	Methyl streptonigrin	-	Unknown	99124
45388	Dacarbazine	FDA approved	A7	99125
45527		-	-	99189
45548	Acid Orange R	-	-	546692
45561		-	-	546705
45595		-	-	99210
45596		-	-	99211
45641		-	-	546757
45730		-	-	99308
45739		-	-	546766
45828	Purine, 2,6,8-tris(hexylamino)-	-	-	546783
45940		-	-	99473
46061	Butanedioic acid, compd. with 10-[3-(4-methyl-1-piperazinyl)propyl]-2-(trifluoromethyl)-10H-phenothiazine (2:1)	-	-	99516
46085	Thioxanthen-9-one, 1-(2-dimethylaminoethylamino)-4-nitro-, hydrochloride	-	-	546811
46213		-	-	99657
46401	.alpha.-Sarcin	-	-	99816
46598		-	-	99983
46647		-	-	100024
46683		-	-	100060
46691		-	-	100068
46728	Crassin acetate	-	Unknown	100097
46788	8-Azaguanosine	-	-	100118
47147	Prodigiosin	-	-	100341
47384		-	-	100401
47438	Fluorometholone Acetate	-	-	100431
47468		-	-	100459
47657		-	-	100545
47713	Autol Red RLP	-	-	100571
47715	Acid Chrome Black Special	-	-	547003
47719	Basic Red 2	-	-	547006
47723	Acid Red 151	-	-	547008
47731	Aniline, p-[[p-(dimethylamino)phenyl][4-(methylimino)-2,5-cyclohexadien-1-ylidene]methyl]-N,N-dimethyl-, monohydrochloride (8CI)	-	-	547016
47786	9H-Purin-2-amine, 6-[[(2,4-dichlorophenyl)methyl]thio]-9-(2-methylpropyl)-	-	-	100590
48006	5-Fluoro-2-Deoxycytidine	-	-	100691
48034	Aziridine, 1,1'-[(2,3,5,6-tetramethyl-1,4-phenylene)bis(1-oxo-2,1-ethanediyl)]bis-	-	Unknown	100712
48160	4-tert-butyl-2-((cyclohexylamino)methyl)-6-methylphenol	-	-	100799
48162		-	-	100801
48229		-	-	100848
48238		-	-	100857
48241		-	-	100860
48300	ANTINEOPLASTIC-48300	-	-	100912
48526		-	-	101039
48630		-	-	547146
48648		-	-	101129
48653		-	-	101132
48693	2-(benzo[d]oxazol-3(2H)-ylmethyl)-5-((cyclohexylamino)methyl)benzene-1,4-diol, dihydrochloride	-	-	547153
48856		-	-	101248
48874		-	-	101265
48890		-	-	101280
48892		-	-	101282
48956		-	-	101309
49096		-	-	101398
49244	L-Cysteine, S-ethyl- (9CI)	-	-	101516
49451	Cucurbitacin B	-	-	101605
49452	Fabacein	-	Unknown	101606
49460		-	-	547228
49488		-	-	101616
49490		-	-	101618
49495		-	-	101623
49502		-	-	101630
49512	.alpha.,.alpha.'-Dithiobis(dimethylthio)formamide	-	-	101636
49520	o-Tolualdehyde, 4-(bis(2-chloroethyl)amino)-	-	-	101643
49565		-	-	101675
49689		-	-	101778
49733		-	-	101819
49842	Vinblastine Sulfate	FDA approved	Tu	101900
50076	D-Mannitol, 1,6-bis[bis(2-chloroethyl)amino]-1,6-dideoxy-, dihydrochloride	-	-	547316
50137		-	-	547318
50188		-	-	102065
50189		-	-	102066
50190		-	-	102067
50273	Pyridine, 3-[[4-[bis(2-chloroethyl)amino]-2-methylbenzylidene]amino]-	-	-	102111
50413	Aristolochic acid	-	-	102224
50567		-	-	102267
50648		-	-	102316
50686	Acna Naphthol T	-	-	102345
50827		-	-	102412
50869		-	-	102440
50974		-	-	547403
51001	Carbomycin	-	-	102559
51045	Acetamide, N-(3-hydroxy-9,10,11-trimethoxy-5H-dibenzo[a,c]cyclohepten-5-yl)-, (S)- (9CI)	-	-	102602
51046	Acetamide, N-(6,7-dihydro-3,9,10,11-tetramethoxy-5H-dibenzo[a,c]cyclohepten-5-yl)-, (S)- (9CI)	-	Unknown	102603
51143	Imidazole-Pyrazole		Ds,Rs	102649
51146	Thioxanthen-9-one, 1-[(2-diethylamino-1-methylethyl)amino]-4-nitro-, hydrochloride	-	-	547421
51148	Cadmium Chloride	-	-	102651
51351	CHALCONE,2-HYDROXY-4,6-DIMETHYL	-	-	102784
51361		-	-	102793
51369		-	-	102801
51524	Atul Orange R	-	-	102889
51535	Amanthrene Supra Black BBN	-	-	102891
51562	Purine, 2-amino-6-[5-bromo-2-(methylthio)-4-pyrimidinylthio]-	-	-	547511
51857	Palladate(2-), dichlorobis(6H-purine-6-thionato-N(7),S(6))-, disodium	-	-	547580
51916	Heptanamide, N,N'-[2,5-bis(1-aziridinyl)-3,6-dioxo-1,4-cyclohexadiene-1,4-diyl]bis- (9CI)	-	-	103155
52003		-	-	103200
52141	A 4426	-	Unknown	103268
52245	Estra-1,3,5(10)-triene-3,17.beta.-diol, 17-methyl- (8CI)	-	-	103345
52384	KC 516	-	-	547646
52389		-	-	547649
52426		-	-	103458
52427		-	-	103459
52429		-	-	103461
52440		-	-	103472
52627		-	-	103589
52745	1H-Naphth[2,3-d]imidazole-4,9-dione, 2-methyl-3-[(4-nitro phenyl)methyl]-1-phenyl-, bromide	-	-	547690
53101	RCH 108	-	-	103790
53183	8-Hydroxy-5-iodoquinoline	-	-	103832
53184		-	-	103833
53292		-	-	103878
53327		-	-	103882
53396	A 15920 K644	-	-	103929
53398	A 8671K119	-	-	103931
53454		-	-	103983
53638	Ethanol, 2-[2-[4-[3-[2-(trifluoromethyl)phenothiazin-10-yl]propyl]-1-piperazinyl]ethoxy]-, dihydrochloride (8CI)	-	-	547823
53861		-	-	547856
53866	Dihydrorotenone	-	-	104227
53892	Pregn-4-ene-3,20-dione, 11.beta.,17-dihydroxy-6.alpha.-methyl-	-	-	104249
54042		-	-	104372
54044	N'-[1-(1-hydroxynaphthalen-2-yl)ethylidene]pyridine-4-carbohydrazide	-	-	104374
54059	1-Aziridinecarboxamide, N,N'-hexamethylenebis(2-methyl-	-	-	104387
54101	Adenine, 9,9'ethylenebis(N,N-dimethyl-	-	-	104409
54251		-	-	104490
54278		-	-	104514
54340		-	-	104544
54393		-	-	104593
54548	Benzene, 1,2-dimethoxy-4-(2-nitro-1-propenyl)- (9CI)	-	-	104661
54690		-	-	104710
54702	Flumethasone	-	-	104722
54709		-	-	104729
54848		-	-	548021
54849		-	-	548022
54854		-	-	104823
54909	Propan-1-one, 2,3-dichloro-1,3-bis(4-methylphenyl)-	-	-	104877
54916		-	-	104884
55114		-	-	104933
55236		-	-	548058
55720	Phosphinic acid, bis(1-aziridinyl)-, 2-naphthalenyl ester (9CI)	-	-	548108
55804		-	-	105438
55849		-	-	105473
55861		-	-	105482
56030	Piperazine, 1-(o-ethylphenyl)-4-(3,4,5-trimethoxybenzoyl)-	-	-	105575
56054	ATPU	-	-	301146
56287		-	-	105730
56410	Porfiromycin		A7	105809
56452		-	-	105830
56544		-	-	105889
56612		-	-	105924
56624		-	-	105934
56633		-	-	548223
56646		-	-	548230
56677	Fluoren-2-amine, 1,3,7-tribromo- (8CI)	-	-	105970
56736		-	-	106012
56779		-	-	548253
56805	p-Dithiin, 2,5-diphenyl- (8CI)	-	-	106056
56808	Quinaldine Blue	-	-	548271
56817	(2,2'-Binaphthalene)-8,8'-dicarboxaldehyde, 1,1',6,6'7,7'-hexahydroxy-5,5'-diisopropyl-3,3'-dimethyl-	-	Unknown	106063
56902		-	-	106106
57048	2-Azaadenine	-	-	548322
57187		-	-	106254
57197	Caffeic acid	-	-	106262
57199	(.+-.)-o-Phenylalanine mustard	-	-	106263
57715		-	-	106643
57759		-	-	106675
57864		-	-	106738
57958		-	-	106807
57969		-	-	106818
58011		-	-	106847
58180	2-Imidazoline, 2-undecyl-	-	-	106952
58239	A 80021F34	-	-	106977
58255		-	-	106991
58329	Benzamide, 5-chloro-2-hydroxy-N-(3-hydroxypropyl)- (9CI)	-	-	107032
58338		-	-	107041
58368	Fugillin dicyclohexylamine salt	-	-	548508
58385	Thiocyanic acid, 1H-purin-6-yl ester (9CI)	-	-	548510
58514	Chromomycin A3	-	-	548532
58539	Benzoic acid, m-nitro-, salicylidenehydrazide	-	Unknown	107140
58573	Pyrimidine, 2,4,5-trichloro-6-ethyl-	-	Unknown	107166
58574	Pyrimidine, 2,4,5-trichloro-6-propyl-	-	Unknown	107167
58575	Pyrimidine, 2,4,5-trichloro-6-isopropyl-	-	Unknown	107168
58634		-	-	107212
58903		-	-	107412
58904		-	-	107413
58905	BC 76	-	-	107414
58906	BC 77	-	-	107415
58924	1,3,5,7,2,4,6,8-Tetraazatetraphosphocine, 2,2,4,4,6,6,8,8-octahydro-2,2,4,4,6,6,8,8-octakis(butylamino)-	-	-	107432
59220	[[5-(5-fluoro-2,4-dioxopyrimidin-1-yl)-3, 4-dihydroxyoxolan-2-yl]methoxy-ydroxyphosphoryl] [3,4,5-trihydroxy-6-(hydroxymethyl)oxan-2-yl] hydrogen phosphate, disodium salt	-	-	548592
59267	SANTALIN	-	-	107571
59270	Sanguinarine nitrate	-	Unknown	548602
59275		-	-	548604
59276		-	-	107576
59413		-	-	548627
59450		-	-	107693
59620	(4a,6a,9-trimethyl-6,7-dioxo-2,3,4,4b,5,6b,10,10a,11,11a,11b,12,13,13a-tetradecahydro-1H-indeno[2,1-a]phenanthren-2-yl) acetate	-	-	107756
59684	N-Butyltriphenylphosphonium bromide	-	-	548642
59687	Acelax	-	-	107784
59729	Antibiotic from Streptomyces Sparsogenes	-	-	107825
59814	Critex	-	-	107894
59937		-	-	108008
59984		-	-	108041
59994		-	-	108050
59996	Anthranilaldehyde, phenylhydrazone (8CI)	-	-	108052
60043		-	-	108097
60044		-	-	548668
60064		-	-	108117
60288	p-Toluidine, N-allyl-	-	-	108323
60387	Dibenzo[f,h]pyrrolo[1,2-b]isoquinoline, 9,11,12,13,13a,14-hexahydro-2,3,5,6-tetramethoxy-, (R)- (9CI)	-	Unknown	108410
60785		-	-	108753
60898		-	-	108854
61297		-	-	108947
61586	Phleomycin (8CI 9CI)	-	-	109025
61747		-	-	548850
61772		-	-	109161
61805	exo-1,2-cis-Dimethyl-3,6-epoxyhexahydrophthalic anhydride	-	Unknown	109184
61837	Flavone, 5-hydroxy-3,3',4',7-tetramethoxy- (8CI)	-	-	109203
61900		-	-	109263
62372		-	-	109500
62485		-	-	548928
62586		-	-	109631
62709	Azastreptonigrin, isopropylidene-	-	-	109738
62752	Pyrimidine, 2,4-diamino-6-(p-iodoanilino)-5-nitroso-	-	-	109764
62791	Ergosterol	-	-	109790
62857	(3-Aminopropyl)thiopseudourea dihydrobromide	-	-	548964
62914	Antioxidant 80	-	-	109830
63357	m-Cresol, 4,6-dichloro-5-ethyl-	-	-	110045
63549	Prednisolone, 9-fluoro-6.alpha.-methyl-, acetate	-	-	110097
63629	1H-Pyrazolo[3,4-d]pyrimidine, 4-amino-1-(p-chlorobenzyl)-	-	-	110111
63701	7H-Pyrrolo[2,3-d]pyrimidine-5-carbonitrile, 4-amino-7-.beta.-D-ribofuranosyl- (8CI 9CI)	-	-	110120
63786		-	-	110129
63839	s-Triazine, 1,3,5-triacryloylhexahydro-	-	-	110146
63878	Cytarabine Hydrochloride	FDA approved	Ds	549052
63984	Cordycepin	Clinical trial	Ds	110230
64087	.alpha.-Clopenthixol dihydrochloride	-	Unknown	549092
64111		-	-	549101
64342		-	-	110300
64692		-	-	110392
64703		-	-	110400
64798		-	-	549181
64821		-	-	549183
64875	3-(9-tert-butyl-3-azaspiro[5.5]undecan-3-yl)-N,N-dimethylpropan-1-amine, dihydrochloride	-	-	549195
64945		-	-	110571
65022		-	-	110626
65104	B 17325K008	-	Unknown	301149
65238		-	-	110720
65239	Accel R	-	-	110721
65346	Antibiotic from Streptomyces	-	-	110741
65381	Acetylenedicarboxamide (8CI)	-	-	110751
65537		-	-	110881
65601	p-(2-Nitropropenyl)anisole	-	-	110909
65628		-	-	110935
65814		-	-	111060
65860	2,7-Naphthalenedisulfonic acid, 3-hydroxy-4-[[4-[[4-[4- [(2-hydroxy-3,6-disulfo-1-naphthyl)azo]benzamido]phenyl] thio]phenyl]azo]-, tetrasodium salt	-	-	549388
65921	Fluorene, 9-bromo-2,4,7-trichloro-	-	-	111113
66020	2H-1,4-Benzodiazepin-2-one, 7-chloro-1,3-dihydro-5-pyrrol-2-yl- (8CI)	-	-	111160
66211		-	-	111315
66214	Laurolinium Acetate	-	-	549420
66230		-	-	111330
66259		-	-	549426
66301		-	-	111390
66323		-	-	549436
66366		-	-	111437
66380		-	-	549446
66457		-	-	111517
66543		-	-	111591
66902		-	-	111722
66914	Pyrimidine, 2,4,6-trichloro-5-propyl-	-	Unknown	111730
66917		-	-	111733
66933	Carbamic acid, diethyldithio-, anhydrosulfide with methanesulfonic acid	-	-	111736
67015	Di-N-butylzinn thioglykolat (German)	-	Unknown	111783
67025	Dypnone guanyl hydrazone hydrochloride	-	-	549536
67041		-	-	111802
67090		-	-	111843
67091		-	-	549544
67118		-	-	111859
67209	1,4-Naphthalenedione, 2-(methylthio)- (9CI)	-	-	111908
67239	Azaribine	-	-	111933
67477		-	-	549602
67478		-	-	549603
67480		-	-	549605
67574	Vincristine Sulfate	FDA approved	Tu	112141
67580		-	-	112147
67586	2-Naphthacenecarboxamide, N-[(6,7-dihydro-7-oxo-v-triazolo[4,5-d]pyrimidin-5-ylamino)methyl]-4-dimethylamino-1,4,4a,5,5a,6,11,12a-octahydro-3,6,10,12,12a-pentahydroxy-6-methyl-1,11-dioxo-	-	-	549609
67588	2-Naphthacenecarboxamide, 4-(dimethylamino)-1,4,4a,5,5a,6,11,12a-octahydro-3,6,10,12,12a-pentahydroxy-N-[(6-mercaptopurin-7(or 9)-yl)methyl]-6-methyl-1,11-dioxo-	-	-	112153
67601		-	-	112160
67603		-	-	112162
67714		-	-	549640
67774		-	-	112275
67798		-	-	112290
67799	Pyrimidine, 2,4,6-trichloro-5-ethyl-	-	-	112291
67817	CTR 6110	-	-	112307
67925		-	-	112382
68075	Thalicarpine	-	-	112494
68088	Guanidine, [(p-fluoro-.alpha.-phenylbenzylidene)amino]-, monohydrochloride	-	-	549708
68091	trans-1,2-Bis(n-propylsulfonyl)ethylene	-	-	112505
68092	Benzene, 1,2,3-trichloro-4,6-dinitro-	-	-	112506
68093		-	Unknown	549709
68154		-	-	112534
68155		-	-	112535
68294	Mercury, bis(1,7-dihydro-6H-purine-6-thionato-N7,S6)-, (T-4)- (9CI)	-	Unknown	549732
68558		-	-	112802
68989	Alanine, 3-[p-[bis(2-chloroethyl)amino]phenyl]-N-(N-formyl-3-phenyl-L-alanyl-, ethyl ester L- (8CI)	-	-	113007
69049		-	-	113066
69187	AT 181	-	-	113202
69413		-	-	113284
69509	Ammonium, trimethyl(1-phenyldodecyl)-, p-toluenesulfonate	-	-	549857
69573		-	-	113367
69575		-	-	113369
69577		-	-	113371
69600	Quinoline, 4-(p-methoxystyryl)- (8CI)	-	-	113390
69603	Quinoline, 4-(2,5-dimethoxystyryl)-	-	-	113393
69604		-	-	113394
69608	Purine-6-thiol, ethyl carbonate	-	-	549870
69811	.beta.-Thiosemicarbazone-N-methylisatin	-	-	114119
69830	Alanine, N-(N-acetyl-L-leucyl)-3-[p-[bis(2-chloroethyl)amino]phenyl]-, ethylester L- (8CI)	-	-	113453
69852	N,N'-Bis(3-aminopropyl)-1,4-butanediamine tetrahydrochloride	-	-	549886
69856	Zinostatin	-	-	113460
69911		-	-	113501
69917		-	-	113506
69945	OMF 59	-	-	113526
70092	Palladate(2-), chlorobis(1,9-dihydro-6H-purine-6-thionato-N(7),S(6))(1,7-dihydro-6H-purine-6-thionato-S)-, disodium	-	-	301151
70194		-	-	113723
70555		-	-	113915
70568		-	-	549989
70660		-	-	113976
70811		-	-	114014
70845	Nogalamycin	-	Unknown	114031
70874	Imidazole-4-carboxamide, 5-(3-butyl-3-methyl-1-triazeno)- (8CI)	-	Unknown	114052
70929	Antibiotic B26,158	-	Unknown	114100
70931	Celastrol	-	Unknown	114102
70933	Cycliramine Maleate	-	-	114103
71090	Propiolic acid, (p-nitrophenyl)-, methyl ester	-	-	114207
71097		-	-	114213
71261	Beta-Thioguanine Deoxyriboside		Ds	114296
71300		-	-	114324
71302		-	-	114326
71381	Acetic acid, (dihydro-1,3,2-dithiarsenol-2-ylmercapto)-	-	Unknown	114361
71423	Megestrol Acetate	FDA approved	Ho	114395
71426		-	-	114398
71536	(3,4-Dichlorobenzyl)triphenylphosphonium chloride	-	-	550165
71669		-	-	550176
71677	7H-Benzo[c]phenothiazine, 7-chloroacetyl-	-	-	114614
71717		-	-	114643
71795	Ellipticine	-	-	114695
71850		-	-	114731
71851	Alpha-Thioguanine Deoxyriboside		Ds	114732
71935	Duramycin	-	-	114798
71948	Thioflavine S	-	-	550242
72055	Sulfonium, dodecyldimethyl- iodide	-	-	550262
72115	(-)-Tetrahydroalstonine	-	-	114926
72151	Coumarin, 6-[[p-[bis(hydroxyethyl)amino]benzylidene]amino]-, dimethyl sulfonate (8CI)	-	-	114951
72234	Plicatic acid	-	-	114999
72254	2-hydroxy-2-(13-methyl-3-oxo-2,3,6,7,8,9,10,11,12,13,14,15,16,17-tetradecahydro-1H-cyclopenta[a]phenanthren-17-yloxy)-1H-indene-1,3(2H)-dione	-	-	115009
72274	SPI1 Gene	-	-	115028
72533		-	-	550328
72564	Isophthalanide, 2-amino-4',4''-di-2-imidazolin-2-yl- (8CI)	-	-	115214
72862	.beta.-Colubrine (8CI)	-	-	115361
72881		-	-	115371
72914		-	-	115384
72917	Brucine, dihydro-	-	-	115386
72939		-	-	550402
72942	DL-Noformicin	-	-	115398
72961	3H-v-Triazolo[4,5-d]pyrimidine, 7-amino-3-.beta.-D-ribofuranosyl- (8CI)	-	Unknown	115409
73013	WLN: T56 BNSNJ FZ	-	-	115446
73019		-	-	115449
73048		-	-	115469
73101		-	-	115519
73109		-	-	115527
73233		-	-	115594
73241		-	-	115602
73287		-	-	115636
73300		-	-	115646
73306	3-[(p-Methoxyphenyl)-thiosemicarbazono]-2-indolinone	-	-	115652
73346	Guanidine, 1-(4,6-dimethyl-2-pyrimidinyl)-3-phenethyl-	-	-	115664
73396		-	-	115697
73411	Acridinium, 3,6-diamino-2,7,10-trimethyl-, chloride (8CI9CI)	-	-	550446
73413	Acid Chrome Black An	-	-	550448
73495	Antibiotic from Nocardia sulphurea	-	-	550460
73705		-	-	115853
73735	B 3845	-	-	115883
73754	Fluorodopan			115900
74199	Pyrimidine, 4-amino-6-(p-bromoanilino)-2-(methylamino)-5-nitroso-	-	-	116172
74437	Diepoxypiperazine	-	Unknown	116301
74663		-	Unknown	116481
74702	Benzamide, N-[4-(2-anthraquinonylamino)-1-anthraquinonyl]- (8CI)	-	-	116515
74859	Salicylic acid, 4-glycol-amido-, 4-p-toluenesulfonate	-	-	116605
74947	A-82	-	-	116681
75140	Benzenesulfonamide, 4-[(6,7-dihydro-6-thioxo-1H-purin-8-yl)azo]-	-	-	550679
75382	Thiophene, tetrahydro-3,4-dibromo-, 1,1-dioxide	-	-	117005
75520	Trifluridine	-	-	117087
75603	Crystalline antibiotic 173t from Pseudomonad	-	-	117143
75627	meso-2,3-Diphenylsuccinic acid	-	-	117155
75747		-	-	117202
75782	Pheophorbide b	-	-	117231
75890	Anthra[1,9-cd]pyrazol-6(2H)-one (8CI9CI)	-	-	117321
75957	8-[-(2-Hydroxynaphthalen-1-yl)diazenyl]naphthalene-1,6-disulfonic acid, disodium salt	-	-	550822
76023	[1,3]Benzodioxolo[5,6-c]phenanthridinium, 1,2-dimethoxy-12-methyl-, hydroxide (9CI)	-	-	550848
76064	Benzylpenillic acid	-	-	117419
76150		-	-	117462
76175		-	-	117473
76351	Uridine, 2'-deoxy-5-fluoro-5'-thio-	-	Unknown	117574
76356	Adenine, 9-.beta.-D-arabinofuranosyl-2-chloro- (8CI)	-	-	117579
76387	Dibenzo[f,h]pyrrolo[1,2-b]isoquinoline, 9,11,12,13,13a,14-hexahydro-2,3,6,7-tetramethoxy-, (S)- (9CI)	-	-	117604
76411	Olivomycin	-	-	550914
76455	Antibiotic from Streptomyces luteogriseus	-	-	117640
76518		-	-	117685
76519	Inosine, 6-thio-, 2',3',5'-tris(4-methoxybenzoate)	-	-	117686
76523		-	-	117689
76627	Antibiotic B 61,893	-	-	117764
76751	Nobiletin	-	-	117869
76779	Streptorubrin	-	-	117896
76808	Benz[g]indolo[2,3-a]quinolizine, 1,2,3,4,4a,5,7,8,13,13b,14,14a-dodecahydro-13-methyl-	-	-	117923
76919	2-Pyridinecarboxylic acid, 5-amino-6-(7-amino-1,2,3,4,5,8-hexahydro- 5,8-dioxo-2-quinolinyl)-4-(2-hydroxy- 3,4-dimethoxyphenyl)-3-methyl-	-	Unknown	117964
76952	9H-Purine-6-thiol, 9-.beta.-D-ribofuranosyl-, 2',3',5'-tributyrate (8CI)	-	-	117989
76955	KC 1260	-	-	117992
76991		-	-	118017
77007		-	-	118033
77021	Pregna-1,4-diene-3,20-dione, 6,9-difluoro-11,17,21-trihydroxy-, (6.alpha.,11.beta.)-	-	-	118045
77038	Antibiotic WR 141	-	-	118060
77039		-	-	550984
77140	(o-Methylbenzyl)triphenylphosphonium bromide	-	-	550992
77141		-	-	550993
77213	Procarbazine Hydrochloride	FDA approved	A7	551000
77471	B 35251	-	-	118303
77495	Inosine, 6-thio-, 2',3',5'-tripentanoate	-	-	118324
77502	Benzenesulfonamide, p-[[(2-aminopurin-6-yl)thio]azo]-	-	-	551023
77541	Indomethacin	-	-	551034
77556	Guanosine, 6-thio-2',3',5'-tripropanoate (9CI)	-	-	118369
77643		-	-	551047
77809	Benzo[b]quinolizinium, 6-methyl- bromide	-	-	551077
77810	Naphtho[1,2-b]quinolizinium, 9-methyl-, bromide	-	-	551078
77830	C.I.-501	-	Unknown	118494
77950	Cirolemycin (USAN)	-	-	118568
78015		-	-	118625
78018	3H-Pyrrolo[3,2-f]quinolinium, 2,3,6,7-tetramethyl-, iodide	-	-	551117
78206	Cyclobenzaprine Hydrochloride	-	-	551139
78298		-	-	118679
78312		-	-	118690
78325		-	-	551151
78365	Guanidine, 1-(p-butoxyphenyl)-3-(p-chlorophenyl)-	-	Unknown	118705
78508	WLN: T56 BN DN FN HNJ D4 IS1	-	-	118805
78572	Quinoline, 4-(hydroxyamino)-, 1-oxide, hydrochloride	-	-	551182
78627	Naphtho[2,1-b]quinolizinium, 7,10-dimethyl- perchlorate	-	Unknown	551192
78629	Naphtho[1,2-b]quinoizinium, 10,13-dimethyl-, chloride	-	-	551194
78634	4H-1-Benzopyran-4-one, 3-hydroxy- 2-(2,4,6-trimethoxyphenyl)-	-	Unknown	118854
78714	Clothixamide Maleate	-	-	118891
79037	Lomustine	FDA approved	A6	119147
79093	4H-1-Benzopyran-4-one, 5-hydroxy-6,7,8-trimethoxy-2-(4-methoxyphenyl)-	-	Unknown	119195
79139		-	-	119212
79140		-	-	119213
79304		-	-	119352
79456	Benzamide, N-(2,4-dimethylphenyl)-2-hydroxy-3-nitro- (9CI)	-	-	119441
79459	Benzamide, N-(5-chloro-2-methoxyphenyl)-2-hydroxy-3-nitro- (9CI)	-	-	119442
79543	Pyridinium, 5-ethyl-2-[2-(8-hydroxy-5-quinolyl)vinyl]-1-methyl- iodide	-	-	551346
79563	1,3-bis(4-chlorobenzyl)-2-(phenanthren-9-yl)hexahydropyrimidine	-	-	119495
79606		-	-	119521
79687		-	-	119581
79688		-	-	119582
79741	2,7-Naphthalenedisulfonic acid, 4-amino-5-hydroxy-3-[[4'- [(2-hydroxy-6,8-disulfo-1-naphthalenyl)azo][1,1'-biphenyl]- 4-yl]azo]-6-(phenylazo)-, tetrasodium salt	-	-	551426
80103	2,3-Butanediol, 1,4-bis(2-methyl-1-aziridinyl)- (8CI)	-	-	119647
80126	Cyclopentanecarboxylic acid, 1-amino-, benzyl ester, p-toluenesulfonate	-	-	119658
80141		-	-	119672
80186	Chrysenex	-	-	119712
80396	1,3-Butanedione, 1-benzo[b]thien-3-yl-4,4,4-trifluoro-	-	-	119835
80465	1H-Naphth[2,3-d]imidazolium, 4,9-dihydro-1,2-dimethyl-4,9-dioxo-3-(phenylmethyl)-, iodide	-	Unknown	551495
80466	1H-Naphth[2,3-d]imidazolium, 4,9-dihydro-1,2-dimethyl-3-(2-methylpropyl)-4,9-dioxo-, iodide	-	-	551496
80467	1H-Naphth[2,3-d]imidazolium, 4,9-dihydro-2-methyl-1-(2-methylpropyl)-3-[2-(4-nitrophenyl)-2-oxoethyl]-4,9-dioxo-, bromide	-	Unknown	551497
80469	1H-Naphth[2,3-d]imidazolium, 4,9-dihydro-1-isopropyl-3-methyl-4,9-dioxo-2-styryl- iodide	-	-	551498
80734		-	-	120072
80735		-	-	120073
80756	Quinoline, 4-(2,4,5-trimethoxystyryl)- (8CI)	-	-	120089
80870	Hydrouracil, 5-bromo-1-(2-deoxy-.beta.-D-erythro-pentofuranosyl)-5-fluoro-6-methoxy- (8CI)	-	-	120162
80948	p-Benzenediacrylanilide, 3',3''-bis(1,4,5,6-tetrahydro-2-pyrimidinyl)-, dihydrochloride	-	-	551561
80997	Ketone, 1,2,3,3a,3b,7,10,10a,10b,11,12,12a-dodecahydro-1,11-dihydroxy-2,5,10a,12a-tetramethyl-7-phenylcyclopenta[7,8]phenanthro[2,3-c]pyrazol-1-yl methyl	-	-	120201
80998	Cortivazol	-	-	551579
81048		-	Unknown	120236
81052	Streptonigrin analog (MeO-N3)	-	-	551586
81206		-	Unknown	551605
81260	Anthraquinone, 1,4-diamino-5-nitro- (8CI)	-	-	551607
81274	Benzophenone, 3,3',4,4',5-pentamethoxy- (8CI)	-	-	120416
81280		-	-	551611
81303		-	-	120441
81403	Ketone, 7-(p-fluorophenyl)-1,2,3,3a,3b,7,10,10a,10b,11,12,12a-dodecahydro-1,11-dihydroxy-2,5,10a,12a-tetramethylcyclopenta-[7,8]phenanthro[2,3-c]pyrazol-1-yl hydroxymethyl, acetate	-	-	120532
81465		-	-	551630
81517	Benz[c]acridin-7(5H)-one, 6,6a,12,12a-tetrahydro-5,5-dimethyl-	-	Unknown	120615
81540		-	-	551645
81747		-	-	120710
81767	Cinnamamide, p-[bis(2-bromoethyl)amino]-.alpha.-cyano-	-	-	120728
81947	component of ASC-4	-	-	120791
82013	p-Toluidine, .alpha.-inden-1-ylidene-N-methyl- (8CI)	-	-	120813
82025	Benzamide, 2-hydroxy-N-(4-methyl-2-nitrophenyl)-3-nitro- (9CI)	-	-	120818
82028	Benzamide, N-(2,3-dimethylphenyl)-2-hydroxy-3-nitro- (9CI)	-	-	120819
82029	Benzamide, N-(2,5-dimethylphenyl)-2-hydroxy-3-nitro- (9CI)	-	-	120820
82109	Iodonium, bis(2,4,6-trimethylphenyl)-, chloride	-	-	551688
82116	Gloxazone	-	Unknown	120866
82133	Algocor	-	-	120877
82151	(1S,3S)-3-Acetyl-1,2,3,4,6,11-hexahydro-3,5,12-trihydroxy-10-methoxy-6,11-dioxo-1-naphthacenedione, hydrochloride, (8S-cis)-	FDA approved	T2	301154
82260	Benzathine tenuazonate	-	-	120968
82274		-	-	120979
82339	WLN: T56 A BN ENTJ A- DT6NJ	-	-	121041
82587	L-Tyrosine, [[4-[bis(2-chloroethyl)amino]phenyl]methylene]hydrazide	-	-	121164
82802		-	-	121243
82803	(3S,8S,9R,10S,13R)-17-(1-acetyl-5-(trifluoro methyl)-1H-pyrazol-3-yl)-10,13-dimethyl-2,3, 4,7,8,9,10,11,12,13,14,15,16,17-tetradecahydro 1H-cyclopenta[a]phenanthren-3-yl-acetate	-	-	121244
82892	Compound B from nogalamycin	-	-	551788
83014		-	-	121313
83066	8-Quinolinol, 5-(chloromethyl)-, hydrochloride	-	-	551802
83110		-	-	121356
83142	Daunorubicin Hydrochloride	-	Unknown	551815
83193	Acronol Brilliant Blue 6G	-	-	551819
83216	Apocannoside	-	-	551826
83217	Benzenesulfonamide, 4,4'-dithiobis[3-amino- (9CI)	-	-	121442
83223	Methanesulfonic acid, silver salt	-	-	551827
83224		-	-	121448
83233	Naphthalene, 1,5-bis(chloromethyl)-	-	-	121454
83265	Tritylcysteine		Tu	556919
83279	4H-1-Benzopyran-4-one, 5,6,7,8-tetramethoxy-2-(2,4,5-trimethoxyphenyl)-	-	Unknown	121489
83281	4H-1-Benzopyran-4-one, 5,6,7,8-tetramethoxy-2-[4-(1-methyl ethoxy)phenyl]-	-	Unknown	121491
83292	6H-Pyrido[4,3-b]carbazole, 1-(p-chlorophenyl)-3,4-dihydro-5-methyl-	-	-	121499
83300		-	-	121506
83318	Phenol, 3,5-dichloro-4-[(4-nitrophenyl)azo]-	-	-	121523
83321		-	-	121526
83327		-	-	121531
83340	Iyomycin B1	-	-	121543
83343		-	-	121546
83459	Indole-2,3-dione, 3-(4,4-dimethyl-3-thiosemicarbazone)	-	-	121625
83492		-	-	121658
83502		-	-	121668
83606		-	-	121736
83628	p-Diazodiphenylamine sulfate-paraformaldehyde polymer	-	-	551899
83633		-	-	551900
83715		-	-	121802
83950	Streptonigrin	-	Unknown	-
84063		-	-	551925
84074	Phosphonium, (3-bromopropyl)triphenyl- bromide	-	Unknown	551934
84086		-	-	121918
84092		-	-	121924
84093	7-(phenyl(p-tolylamino)methyl)quinolin-8-ol	-	-	121925
84094		-	-	121926
84096	8-Quinolinol, 7-[.alpha.-(8-quinolylamino)benzyl]-	-	-	121928
84145		-	-	551943
84167		-	-	121988
84423	Homidium Chloride	-	-	551971
84429	Chloromethyl 5-nitro-2-furyl ketone	-	-	122170
84661		-	-	122310
85068		-	-	122442
85069		-	-	122443
85230	Indole-3-propionic acid, 5-[bis(2-chloroethyl)amino]-, methyl ester	-	-	122579
85234	Pinnatifidin	-	-	122583
85235	Ambrosin	-	-	122584
85236	Ambrosa-2,11(13)-dien-12-oic acid, 6.alpha.,8.beta.-dihydroxy-4-oxo-, 12,8-lactone (8CI)	-	Unknown	122585
85242	Azuleno[4,5-b]furan-2,9-dione, decahydro-6a-hydroxy-6,9a-dimethyl-3-methylene-, [3aS-(3a.alpha.,6.beta.,6a.alpha.,9a.beta.,9b.alpha.)]- (9CI)	-	-	122591
85262		-	-	122611
85323		-	-	122669
85372		-	-	122714
85431		-	-	552038
85442	Amiodarone Hydrochloride	-	Unknown	552042
85450		-	-	122771
85459	Pyrocatechol, 3,6-bis(morpholinomethyl)-	-	-	122780
85485		-	-	122805
85561	3-hydroxy-4-((1-hydroxynaphthalen-2-yl)diazenyl)-7-nitronaphthalene-1-sulfonic acid, sodium sallt	-	-	552070
85566	Aceto SDD 40	-	Unknown	552071
85700	Quinolinium, 2-[2-(8-hydroxy-5-quinolyl)vinyl]-1,6-methyl-, iodide (8CI)	-	-	552094
85701	Quinolinium, 6-ethoxy-2-[2-(8-hydroxy-5-quinolyl)vinyl]-1-methyl- iodide	-	-	552095
85743	Acetic acid, [(ethoxythioxomethyl)thio]- (9CI)	-	-	122962
85759		-	-	552097
85775		-	-	122982
85776	WLN: L7VJ BOVR DNW& CI	-	-	122983
85779		-	-	122986
85791	Ethacrynic Acid	-	Unknown	122995
85998	Streptozocin	FDA approved	A7	123022
86005	Compound A from nogalamycin	-	-	123029
86078	k-Strophanthidin	-	-	123094
86100		-	-	123111
86140	Bis[(3-pyridyl)methyl]amine	-	-	123147
86225	Acetone bis(3,5-di-tert-butyl-4-hydroxyphenyl) mercaptole	-	-	123183
86354	(p-Nitrophenyl)phenyliodonium bromide	-	Unknown	552155
86368		-	-	552162
86371	Quinolinium, 2-[2-(8-hydroxy-5-methyl-7-quinolyl)vinyl]-1,6-dimethyl- iodide	-	-	552165
86372	Quinolinium, 6-ethoxy-2-[2-(8-hydroxy-5-methyl-7-quinolyl)vinyl]-1-methyl- iodide	-	-	552166
86373	Quinolinium, 4-[2-(8-hydroxy-5-methyl-7-quinolyl)vinyl]-1-methyl- iodide	-	Unknown	552167
86374		-	-	552168
86467		-	-	123328
86714		-	-	123557
87015	1,1'-(benzo[d][1,3]dioxol-5-ylmethylene)dipiperazine	-	-	123833
87034		-	-	123849
87084		-	-	123897
87086		-	-	123899
87112		-	-	552216
87119		-	-	552217
87197		-	-	123971
87221	Actinomycin C3	-	-	552239
87222	Actinomycin C3	-	-	552240
87314	Card-20(22)-enolide, 3,5,14,19-tetrahydroxy-, (3.beta.,5.beta.)- (9CI)	-	-	124038
87364	3,6-dibromophenanthrene-9,10-dione	-	-	124085
87413	Vilangin	-	-	552275
87450		-	-	124163
87500	Solacongestidine	-	Unknown	124176
87862	Sulfonaphtholazoresorcinol	-	-	124394
87864	chel-180	-	-	124396
87868	Phenethyl Isothiocyanate	-	Unknown	124400
87877	8-hydroxy-7-((6-sulfonaphthalen-2-yl) diazenyl)quinoline-5-sulfonic acid	-	-	124408
88054		-	-	395704
88065		-	-	395715
88104	trans-3(2-Chlorocyclohexyl)-1-(2-chloroethyl)-1-nitroso-urea	-	-	395745
88135	Madecassic Acid	-	-	395760
88381		-	-	395970
88421	Crinamin	-	-	396010
88468	ENTAMYCIN	-	-	552388
88499	.alpha.-Toluenesulfonyl fluoride (8CI)	-	-	396084
88536	Calusterone	FDA approved	Ho	396120
88871		-	-	396310
88903		-	-	552426
88915		-	-	396351
88916	10,13-dimethyl-17-(2-methyl-1,3-thiazol-4-yl)-1,2,6,7,8,9,11,12,14,15,16,17-dodecahydrocyclopenta[a]phenanthren-3-one	-	-	396352
88927	Ardisin	-	-	552432
88941	Vanadium, oxohydroxybis(8-quinolinolato)-	-	-	552438
88971		-	-	396389
89074	Thiosulfuric acid (H2S2O3), -[2-[(5-cyclohexylpentyl)amino]ethyl] ester (9CI)	-	Unknown	396437
89133		-	-	552455
89167		-	-	396482
89171		-	-	552476
89172	2H-Tetrazolium, 3-(2-biphenylyl)-2,5-diphenyl- chloride	-	-	552477
89201	Estramustine	-	-	396503
89239	B. W. 61-32	-	-	552487
89488		-	-	396747
89500		-	-	396759
89602	1-Piperazineethanol, 4-(4-chlorophenyl)-alpha-[(4- methoxyphenoxy)methyl]-	-	-	396843
89671	(+)-Brefeldin A	-	-	396903
89736	s-Triazine, 2-amino-4-anilino-6-(chloromethyl)-	-	-	396956
89822		-	-	397035
90137	Benzene, 1-[(2,4-dinitrophenyl)thio]-4-methyl-2-nitro-	-	-	397126
90311		-	-	397157
90318		-	-	552594
90394	9H-Purine, 6,8-diamino-9-.beta.-D-ribofuranosyl-	-	-	397227
90411	Benzamide, N-(2-ethylphenyl)-2-hydroxy-3-nitro- (9CI)	-	-	397235
90558	Isocorydine methiodide	-	-	552614
90600	Iodonium, (p-nitrophenyl)phenyl- nitrate	-	-	552626
90615		-	-	552628
90616	Betamethasone Sodium Phosphate	-	-	552629
90636	Vinblastine	-	Unknown	397349
90736		-	-	397426
90810		-	-	397494
90829		-	-	552649
90862		-	-	397522
90903		-	-	397559
90904	Nicotinic acid, [p-[bis(2-chloroethyl)amino]benzylidene]hydrazide	-	-	397560
91397		-	-	397843
91513	Picolinaldehyde, 2-pyridylhydrazone (8CI)	-	-	397954
91745	9H-Purine, 6-[(1-methyl-4-nitro-1H-imidazol-5-yl)thio]-9-.beta.-D-ribofuranosyl-, compd. with ethanol (4:1)	-	-	398075
92188	EB-VII-93	-	-	398306
92207		-	-	398319
92339	Fluocinolone Acetonide	-	-	398387
92412		-	-	398450
92423	Uridine, 2'-deoxy-5-(trifluoromethyl)-, 3',5'-bis(p-nitrobenzoate)	-	-	398456
92494	Pyrimidine, 2,4,6-trichloro-5-(2-propenyl)-	-	Unknown	398491
92495		-	-	398492
92497	Pyrimidine, 2,4,6-trichloro-5-pentyl-	-	Unknown	398494
92498		-	-	398495
92499		-	-	398496
92504		-	-	398501
92506	Pyrimidine, 2,4,6-trichloro-5-heptyl-	-	Unknown	398503
92510		-	Unknown	398507
92530		-	-	398524
92585	Benzoic acid, p-[(purin-6-ylthio)mercuri]-	-	-	552805
92618	Di-n-propyltin dichloride	-	-	398595
92713	Arabinopyranoside, methyl, 2,3-dibenzoate 4-p-toluenesulfonate, .beta.-L- (8CI)	-	-	398649
92835		-	-	398754
92859	Arsenic oxide (As2O3)	FDA approved	Apo	398774
92909	ANTINEOPLASTIC-92909	-	-	398819
92915	ANTINEOPLASTIC-92915	-	-	398824
92937	1H-Benzo[a]carbazole-1,4(11H)-dione, 11-methyl-	-	-	398840
92941		-	-	398844
92954	k-Strophanthidin, acetyl-	-	-	398853
92988		-	-	398879
93033		-	-	398914
93077		-	-	398947
93131	Alant camphor	-	-	398983
93132	Agroclavine	-	Unknown	552852
93134	Bufa-20,22-dienolide, 3-[(6-deoxy-4-O-.beta.-D-glucopyranosyl-.alpha.-L-mannopyranosyl)oxy]-5,14-dihydroxy-19-oxo-, (3.beta.,5.beta.)- (9CI)	-	-	552853
93135	N-Methylocoteamine	-	-	552854
93287		-	-	399116
93301		-	-	399128
93354		-	-	399174
93355		-	-	399175
93419	Antibiotic U 20661	-	-	399232
93427		-	-	399237
93489	3(2H)-Isothiazolone (9CI)	-	-	399268
93674	Aromoline	-	-	552892
93734		-	Unknown	552925
93737	(Tetramethyldiamino)diphenylketoimine hydrochloride	-	-	552927
93739	Basic Fuchsin	-	-	552928
93819	Valproic Acid	-	-	399407
93866	Naphtho[2,1-b]quinolizinium, 5-chloro-7-methyl- perchlorate	-	-	552969
93868	Naphtho[1,2-b]quinolizinium, 3,13-dimethyl- perchlorate	-	-	552971
93958	Barbituric acid, 5-cinnamylidene-	-	-	399513
93967		-	-	399522
94037	Mikanin	-	-	399567
94600	Camptothecin		T1	-
94703		-	-	399803
94739	Demethyltylophorinine	-	-	399838
94743	Cucurbitacin A	-	-	399840
94783		-	-	399871
94810		-	-	399896
94820	2,2'-(4,4'-methylenebis(4,1-phenylene))diisoindoline-1,3-dione	-	-	399906
94889	Flavone, 5-hydroxy-3',4',5',6,7,8-hexamethoxy- (8CI)	-	Unknown	399921
94945	Questiomycin A	-	-	399953
95099	Anhydrogitalin	-	-	400035
95170		-	-	400098
95381		-	-	400198
95382	Camptothecin, acetate		T1	400199
95397	1,4-Naphthoquinone, 2,3-bis[(2-hydroxyethyl)thio]- (7CI)	-	-	400206
95434		-	-	400236
95441	Semustine		A7	301159
95448	s-Triazole, 3-(5(or 4)-diazoimidazol-4(or 5)-yl)-	-	-	553141
95466	PCNU		A7	-
95570		-	-	553218
95580	Hexamethylene Bisacetamide	-	-	400297
95609		-	-	400325
95676		-	-	553234
95678	Hydrazinecarbothioamide, 2-[(3-hydroxy-2-pyridinyl)methylene]- (9CI)		Ds	400378
95779		-	-	400478
96019	.alpha.-Solanine	-	-	400708
96349	Coralyne chloride	-	-	553258
96517		-	-	553295
96541	Benzo[f]quinoline-3-carbonitrile, 4-benzoyl-3,4-dihydro- (8CI9CI)	-	-	400897
96694		-	-	553319
96914	Benzophenone, decafluoro- (8CI)	-	-	401240
96932	Benzothiazolium, 3-ethyl-2-[3-(3-ethyl-2(3H)-benzothiazolylidene)-2-methyl-1-propenyl]-, iodide (9CI)	-	-	553332
96996	B 169	-	-	401311
97338	(+)-Isotetrandrine	-	-	401567
97345		-	-	553409
97371	Phosphine, tri-p-tolyl- (8CI)	-	-	401590
97372	(Ethylmethyl)octadecylsulfonium iodide	-	-	553417
97374	Diethylcyanine	-	-	553418
97388	Benzoic acid, silver(1+) salt (8CI9CI)	-	-	553426
97419	n-Octyl ester of 3,4,5-trihydroxybenzoic acid	-	-	401614
97845		-	-	402006
97882		-	-	553487
97885		-	-	553488
97960		-	-	402091
98363		-	-	402345
98481		-	Unknown	402459
98535	Aminoanfol	-	-	553538
98572	.beta.-Resorcylaldehyde, 2-pyridylhydrazone	-	-	402538
98573		-	-	402539
98579	Bromochloromethotrexate	-	-	553546
98580	Glutamic acid, N-[3-bromo-4-[[(2,4-diamino-6-pteridinyl)methyl]methylamino]benzoyl]- (9CI)	-	-	553547
98710		-	-	402659
98828		-	-	402714
98883	Thiazolo[3,2-f]phenanthridinium, 2-methyl- perchlorate	-	Unknown	553610
98892		-	-	402743
98904	Thiazolo[3,2-f]phenanthridinium, 3-phenyl- perchlorate	-	Unknown	553625
98905	2-(phenanthridin-6-ylthio)-1-phenylethanone	-	-	402746
98938		-	-	402766
99016	Calycanthine (8CI9CI)	-	-	402825
99027		-	-	402829
99060		-	-	402860
99087		-	-	402886
99148		-	-	402940
99282	Rubradirin	-	-	403019
99296	Tetramethylammonium bis[decahydro-C- phenyldicarbaundecaborato(1-)]ferrate(I)	-	-	553688
99303		-	-	403032
99445	Aracytidine 5'-monophosphate	-	-	403149
99515		-	-	553722
99543		-	-	553729
99671		-	-	403323
99676		-	-	403328
99733	Pyrimido[5,4-e]-as-triazine-5,7(6H,8H)-dione, 6-methyl-	-	-	403384
99843	Antibiotic E 212	-	Unknown	403474
100045	Acer negundo saponin	-	-	663922
100046	Elephantopin	-	-	403575
100058	Galantamin	-	-	403585
100071	Haloprogin	-	-	403590
100279		-	-	403723
100290	Aklavin hydrochloride	-	Unknown	403734
100434	3-Pyrrolin-2-one, 4-hydroxy-5-(p-hydroxybenzyl)-3-(N-phenylacetimidoyl)-	-	-	403783
100445	TN 16	-	-	403785
100723	(o-Chlorophenyl)hydrazizne hydrochloride	-	-	553877
100737		-	-	403870
100777	4-Penten-1-ol, 4-nitro-5-(9-phenanthryl)-, acetate	-	-	403905
100844	Antibiotic X-5079C	-	-	403963
100856		-	-	553897
100880	Camptothecin Sodium		T1	399733
101003		-	-	404090
101088	Ergosta-2,24-dien-26-oic acid, 5,6-epoxy-4,22,27-trihydroxy-1-oxo-, .delta.-lactone, (4.beta.,5.beta.,6.beta.,22R)- (9CI)	-	-	404166
101319		-	-	404359
101489	Nicotinic acid, [4-[bis(2-chloroethyl)amino]-2-methoxybenzylidene]hydrazide	-	-	404425
101490		-	-	404426
101492	Anthranilic acid, N-[p-[bis(2-chloroethyl)amino]benzylidene]- (8CI)	-	Unknown	404428
102004	Catharanthine, monohydrochloride	-	-	554030
102049	Flavone, 3-hydroxy-3',4',5,7-tetramethoxy- (8CI)	-	Unknown	404757
102051		-	-	404759
102057		-	-	404765
102064		-	-	404769
102067	6H-Indeno[1,2-c]isoquinoline-5,11-dione, 6-methyl-	-	-	404772
102068		-	-	404773
102225		-	-	404800
102378		-	-	404935
102622	Solanocapsin	-	-	405016
102627	Yoshi-864			301162
102742		-	-	405057
102809	Althiomycin	-	-	554091
102810	D-ARABINOSE, 5-O-TRITYL-TRIBENZOATE	-	-	405109
102811	D-Ribitol, 1-C-(7-amino-1H-pyrazolo[4,3-d]pyrimidin-3-yl)- 1,4-anhydro-, (S)- (9CI)	-	-	405110
102813	.beta.-Rhodomycin	-	-	554092
102814	U 20043	-	-	405112
102815	Compound D from Nogalamycin	-	-	405113
102816	Azacitidine	FDA approved	DNMT	405114
102817	Elephantin	-	-	405115
102866	Aspergillin	-	-	118428
103005	Noracronycine	-	-	405220
103231		-	-	405327
103336	Menoctone	-	-	405358
103508	1,3-Propanediamine, N,N'-bis[p-[bis(2-chloroethyl)amino]benzyl]-, dihydrochloride	-	-	554178
103517		-	-	405417
103704		-	Unknown	405516
103755		-	-	554202
103779	Alizarine Navy Blue AT	-	-	554205
103832		-	-	405595
103870		-	-	405631
104129	s-Triazine, 4,6-diamino-1-[p-[4-(2,4-dichlorophenyl)butyl]phenyl]-1,2-dihydro-2,2-dimethyl-, monohydrochloride	-	-	554215
104795	Cyclamin	-	-	554250
104800	Mitolactol	-	-	405761
104801	Cytembena	-	-	554254
104942	Euparotin	-	-	405767
104943	Euparotin acetate	-	Unknown	405768
105014	Adenosine, 2-chloro-2'-deoxy-	FDA approved	Ds	405818
105023	B 17476	-	-	405825
105024	Mithramycin C	-	-	405826
105131	Pycnamine	-	-	405829
105132	Deoxycamptothecin		T1	405830
105307		-	-	405876
105348		-	-	405917
105444		-	-	405994
105509		-	-	406033
105546	Adenosine, N-(3-methyl-2-butenyl)- (8CI 9CI)	-	-	301163
105550		-	-	406071
105808	5,8-Quinolinedione, 6-amino-7-bromo-	-	Unknown	406251
105827	SANGIVAMYCIN,-THIO	-	-	406267
105900		-	-	406276
106193	Fusarubin	-	Unknown	406441
106246		-	-	406494
106360		-	-	406600
106399	.alpha.-Elaterin	-	-	406639
106408	Anthramycin methyl ether	-	-	406648
106442		-	-	406682
106461		-	-	406694
106486	D-Ribitol, 1,4-anhydro-1-C-(6,7-dihydro-7-oxo-1H-pyrazolo[4,3-d]pyrimidin-3-yl)-, (S)-	-	-	406712
106531	Urea, 1-(2-chloroethyl)-3-(3,4-dichlorophenyl)-1-nitroso- (8CI)	-	Unknown	406744
106553	.alpha.-Hederin (8CI)	-	-	406764
106554	Musennin	-	-	406765
106557	5.alpha.,25D-Spirostan-3.beta.-ol glycoside	-	-	406768
106648		-	-	554358
106677	Senecionine, N-oxide	-	-	406851
106723		-	-	406892
106859	4-Penten-1-ol, 5-(2-naphthalenyl)-4-nitro-, acetate (ester) (9CI)	-	-	406945
106907		-	-	406990
106969	Centaureidin	-	-	407011
106995	Lomofungin (USAN)	-	-	407018
107043		-	-	407030
107067	Tirandamycin	-	-	407032
107124	Camptothecin, hydroxy-		T1	407052
107237		-	-	407130
107392	5-Hydroxypicolinaldehyde Thiosemicarbazone		Ds	301166
107413	Securinan-11-one (9CI)	-	-	407240
107432	Solypertine d-tartrate (USAN)	-	-	407248
107529	Pararosaniline Pamoate	-	-	407307
107658	Cytochalasin B	-	-	407385
107660	Actinomycin Pip T.beta.	-	-	568262
107680	Flumethasone Pivalate	-	-	407405
108018	14-Chelidoninone	-	-	407513
108165	Thiothixene	-	-	407637
108225		-	-	407673
108608		-	-	407998
109084		-	-	408330
109128		-	-	408371
109131	10,13-dimethyl-17-(2-(6-(methylthio)-9H-purin-9-yl)acetyl)-6,7,8,9,10,11,12,13,14,15,16,17-dodecahydro-1H-cyclopenta[a]phenanthren-3(2H)-one	-	-	408374
109154		-	-	408394
109155		-	-	408395
109156		-	-	408396
109188		-	-	554660
109229	Asparaginase	-	Protein synthesis inhibitor	408433
109248		-	-	408450
109292		-	-	408490
109351	(+)-Daunomycinone	-	-	554684
109440	Theasapogenol A	-	-	408614
109451		-	-	408623
109509		-	-	408669
109555	Carbanilide, 4,4'-diacetyl-, bis(amidinohydrazone), dimethanesulfonate	-	-	408710
109593		-	-	408735
109724	Ifosfamide	FDA approved	A7	301170
109825		-	-	408914
109834		-	-	554722
109836		-	-	554724
109874	Carbendazim	Clinical trial	Tu	408937
110275		-	-	409037
110363	Phosphonium, (2,4-dichlorobenzyl)triphenyl-, chloride	-	-	554758
110383	Naphtho[1,2-c]quinolizinium, 13-methyl-, chloride	-	-	554763
110407	Nitromifene Citrate	-	-	409126
110602	Phosphonium, triphenyl-1,2-propadienyl-, bromide (9CI)	-	-	554792
110630		-	-	409216
110800	Urea, N-(2-chloroethyl)-N'-(3,4-dihydro-2H-1-benzothiopyran-4-yl)-N-nitroso- (9CI)	-	Unknown	409361
111041		-	-	409390
111118		-	-	409435
111119	2H-1-Benzopyran-3-carboxylic acid, 5,7-dimethoxy-2-oxo-, ethyl ester	-	-	409436
111135		-	-	409448
111180	Acetylcysteine	-	-	409483
111533	Camptothecin, methoxy-		T1	409635
111556	Naphthalene, 2-(2-nitrovinyl)-	-	-	409651
111580		-	-	409674
111581	1H-Indole-2,3-dione, 3-[(2-nitrophenyl)hydrazone]	-	-	409675
111650		-	-	409719
111654		-	-	409723
111702	p-Dioxane-2-methanol, 3,5-dihydroxy-6-[6-(methylthio)-9H-purin-9-yl]-	-	-	409749
112125	s-Triazine, tri-2-pyridyl-	-	-	409856
112152	Plumericin	-	-	409876
112166	Cucurbitacin K	-	Unknown	409890
112167	Cucurbitacine (i)	-	-	409891
112200		-	-	409907
112257	Alizarol Cyanine RC (Biological stain)	-	-	554995
112535	s-Triazine, 4,6-diamino-1,2-dihydro-2,2-dimethyl-1-[m-[2-(p-nitro-phenoxy)ethoxy]phenyl]-, monohydrochloride (8CI)	-	-	555042
112751		-	-	410216
112758	Rubomycin	-	Unknown	555066
112796		-	-	410253
112846	Aspartic acid, N-[p-[[(2,4-diamino-6-quinazolinyl)methyl]amino]benzoyl]-, L-(8CI)	-	-	555076
112849		-	-	410300
112929	Sennoside A (8CI)	-	-	555084
112938		-	-	410379
112960		-	-	410393
112965		-	-	410398
113053		-	-	410464
113112	Phosphinic amide, P,P-bis(2,2-dimethyl-1-aziridinyl)-N-2-pyrimidinyl-	-	-	301173
113136	Mansonone F	-	Unknown	410540
113237		-	-	555117
113423	Baker's Antifol	-	-	410623
113452		-	-	410647
113455		-	-	410649
113497	D-Homo-24-nor-17-oxachola-1,20,22-triene-3,16-dione, 7-(acetyloxy)-14,15:21,23-diepoxy-4,4,8-trimethyl-, (5.alpha.,7.alpha.,13.alpha.,14.beta.,15.beta.,17a.alpha.)- (9CI)	-	-	410685
113764	U 32027	-	-	410739
113802		-	-	410750
113908		-	-	410756
113926	Rifampin	-	-	410773
113943	6-Bromosangivamycin	-	-	410790
113951	6-Bromotoyocamycin	-	-	410798
114016		-	-	410832
114340	Cochliobolin A	-	-	410945
114341	Caerulomycin	-	-	410946
114345	DEOXYNOGALAROL,7-	-	-	410949
114346		-	-	410950
114381		-	-	410980
114382		-	-	555247
114512		-	-	555264
114514		-	-	555266
114567	Eupachlorin	-	Unknown	411134
114568	Eupachlorin acetate	-	Unknown	411135
114570	Eupachloroxin	-	-	411137
114572	Ryanodine	-	-	555278
114696		-	-	555300
114766		-	-	411295
114781	Pederin	-	-	411302
115447	1,4-Diamino-2,3-anthraquinonedicarboximide	-	-	555394
115497	Butyrophenone, 3'-[(5-butyryl-2,4-dihydroxy-3,3-dimethyl-6-oxo-1,4-cyclohexadien-1-yl)methyl]-2',4',6'-trihydroxy-5'-methyl- (8CI)	-	-	411660
115526	Pyrazolo[5,1-c]-as-triazine, 3,4-dimethyl- (8CI)	-	-	411679
115610		-	-	555419
115618		-	-	411759
115625		-	-	411762
115712	TUBERCIDIN 3', 5'-CYCLIC PHOSPHATE SESQUIHYDRATE	-	Unknown	411841
115855		-	-	411956
115892		-	-	411986
115928	Benzonitrile, 3-(4,6-diamino-2,2-dimethyl-1,3,5-triazin-1(2H)-yl)-, monoethanesulfonate (9CI)	-	-	412016
115980		-	-	412045
116280	7H-Pyrrolo[2,3-d]pyrimidine-5-carboxamide, 4-amino-7-.beta.-D-ribofuranosyl-, 3-oxide	-	-	555505
116282	7H-Pyrrolo[2,3-d]pyrimidine-5-carbohydroximic acid, 4-amino-7-.beta.-D-ribofuranosyl-, monohydrochloride (8CI)	-	-	555507
116336	Dehydroheliotridine	-	-	412220
116491		-	-	412335
116535	1H-Indole-2,3-dione, 3-[(pentafluorophenyl)hydrazone]	-	-	412375
116536		-	-	412376
116555	Nogalamycin-N-oxide	-	-	412389
116590		-	-	412421
116640		-	-	412471
116661		-	-	555570
116692		-	-	555585
116693		-	Unknown	555586
116702		-	-	412506
116758		-	-	412548
116787	Acovenoside A (8CI)	-	-	412572
116789	Acovenoside B	-	-	412573
116878	Cardiac glycoside	-	-	412637
117011		-	-	412722
117024		-	-	412734
117028		-	-	412736
117180	Scillirosidin, 1.alpha.,2.alpha.-epoxy-	-	-	412756
117181	.alpha.-Cyclopiazonic acid	-	-	412757
117186	Acelax	-	-	412761
117187	Indole-2,3-dione, 5,7-dichloro-, 3-[(o-nitrophenyl) hydrazone]	-	Unknown	412762
117188		-	-	412763
117191		-	-	412766
117192	Indole-2,3-dione, 3-[(o-chlorophenyl)hydrazone]	-	-	412767
117194		-	-	412769
117196		-	-	412771
117199		-	-	412773
117212		-	-	412776
117269	4-(4,6-diamino-2-(4-chlorophenyl)-1,3,5-triazin-1(2H)-yl)-N-(pyrimidin-2-yl)benzenesulfonamide	-	-	412830
117271		-	-	412832
117274		-	-	412835
117281	ANTINEOPLASTIC-117281	-	-	412842
117285		-	-	412846
117356	D-Amethopterin	-	-	412893
117614	Adam CA	-	Unknown	413114
117619		-	-	413119
117739	Pyridine, 3-(2,4-dinitrophenoxy)- (9CI)	-	-	413165
117915	Indole-2,3-dione, 5-methyl-, 3-[(o-nitrophenyl)hydrazone]	-	-	413301
117917	Indole-2,3-dione, 7-methyl-, 3-[(o-nitrophenyl)hydrazone]	-	-	413303
117949		-	-	413316
118028	Phenazastanine, 5,10-dihydro-5,10,10-trimethyl-	-	-	413333
118030		-	-	555774
118051		-	Unknown	413351
118087		-	-	555791
118090	Isoxanthopterin	-	-	413376
118095	1,2,4,5-Benzenetetramine, tetrahydrochloride (8CI9CI)	-	-	555793
118097		-	-	413381
118176	Prototryptochrome, iodo-	-	-	413454
118218	Fludarabine	FDA approved	Ds	413479
118516		-	-	555860
118695	NSC 69907	-	-	113499
118732		-	-	413779
118742	Pentamethylmelamine	-	-	555892
118767		-	-	413804
118836		-	-	413856
118976	Benzyl Isothiocyanate	-	Unknown	413937
118994	Inosine Dialdehyde			301177
119236		-	-	414130
119621		-	-	414302
119754	Berbinium, 7,8,13,13a-tetradehydro-2,3:9,10-bis(methylenedioxy)-, chloride (8CI)	-	Unknown	556018
119875	Cisplatin	FDA approved	A7	301178
119889	2,3,4,5-tetrabromo-6-(3,6-dihydroxy-9H-xanthen-9-yl)benzoic acid	-	-	414497
119910	2-(4,5,6-trihydroxy-3-oxo-3H-xanthen-9-yl)cyclohexanecarboxylic acid	-	-	414515
119913	7-methyl-3-(4,5,6-trihydroxy-3-oxo-3H-xanthen-9-yl)bicyclo[2.2.1]hept-5-ene-2-carboxylic acid	-	-	414518
119915	3-(4,5,6-trihydroxy-3-oxo-3H-xanthen-9-yl)propanoic acid	-	-	414520
120050		-	-	556053
120186		-	-	414667
120288		-	-	414727
120634		-	-	415014
120672		-	-	415046
120925		-	-	415235
120958	Adenosine, N-(2-furanylmethyl)- (9CI)	-	-	415254
121073		-	-	415302
121129		-	-	556370
121139	Acrophylline	-	Unknown	415334
121145	Acetic acid, hydroxy-, 6-ethenyldecahydro-5-hydroxy-4,6,9,10-tetramethyl-1-oxo-3a,9-propano-3aH-cyclopentacycloocten-8-yl ester, [3aS-(3a.alpha.,4.beta.,5.alpha.,6.alpha.,8.beta.,9.alpha.,9a.beta.,10	-	-	415340
121182	9-(2-Amino-2-deoxy-d-xylofuranosyl) adenine	-	-	415374
121210	DHEA Mustard	-	-	415398
121322		-	-	415498
121713		-	-	415643
121771		-	-	556484
121848	Laudanosolinium, 2-methyl-, bromide (.+-.)-	-	-	556503
121868		-	-	415751
122023	Valinomycin	-	-	556534
122060	Ethanesulfonic acid, compd. with N-[[3-[2-chloro-4-(4,6-diamino-2,2-dimethyl-s-triazin-1(2H)-yl)phenoxy]propyl]carbamoyl]metanilyl fluoride (1:1) (8CI) (MF2)	-	-	415906
122131		-	-	415965
122226	Laureatin	-	-	416006
122263		-	-	556572
122291	o-Toluenesulfonyl fluoride, 5-[3-[3-[2-chloro-4-(4,6-diamino-2,2-dimethyl-s-triazin-1(2H)-yl)phenoxy]propyl]ureido]-, monoethanesulfonate (8CI)	-	-	416048
122415	Dinatin	-	-	416148
122621		-	-	556631
122656		-	-	416331
122657		-	-	416332
122716	Stendomycin salicylate	-	-	416389
122750	Geldanamycin	-	-	416395
122758	Tretinoin	FDA approved	Ho	416403
122759	Vitamin A Compound	-	-	416404
122819	Teniposide	FDA approved	T2	416461
122822		-	-	416464
122864	Styrene, 2,6-dichloro-.beta.-nitro-	-	-	416469
122870	Aspartic acid, N-[p-[[(2,4-diamino-5-methyl-6-quinazolinyl)methyl]amino] benzoyl]-, L- (8CI)	-	-	556680
123111	Azirino[2',3':3,4]pyrrolo[1,2-a]indole-4,7-dione, 1,1a,2,8b-tetrahydro-8-(hydroxymethyl)-6-methoxy-1,5-dimethyl-, carbamate (ester)	-	-	416674
123115	Azirino[2',3':3,4]pyrrolo[1,2-a]indole-4,7-dione, 1,1a,2,8,8a,8b-hexahydro-8-(hydroxymethyl)-8a-methoxy-5-methyl-6-(propylamino)-, carbamate (ester)	-	-	416678
123127	Doxorubicin Hydrochloride	FDA approved	T2	301181
123138	Alanine, 3-[(p-chloro-.alpha.,.alpha.-diphenylbenzyl)thio]-, L- (8CI)	-	-	416695
123139	L-Cysteine, S-[(4-methylphenyl)diphenylmethyl]- (9CI)	-	-	416696
123140	Alanine, 3-[(.alpha.,.alpha.-di-p-tolylbenzyl)thio]-	-	-	416697
123147		-	-	416703
123383	Flavone, 7-hydroxy-3',4'-dimethoxy- (8CI)	-	-	416862
123399		-	-	416874
123461	Benzenesulfonyl fluoride, 4-[[3-[2-chloro-4-(4,6-diamino-2,2-dimethyl-1,3,5-triazin-1(2H)-yl)phenyl]-1-oxopropyl]amino]-, monoethanesulfonate (9CI)	-	-	416918
123463	Ethanesulfonic acid, compd. with 4-[3-[p-(4,6-diamino-2,2-dimethyl-s-triazin-1(2H)-yl)benzyl]ureido]-o-toluenesulfonyl fluoride (1:1) (8CI)	-	-	416920
123468	Ethanesulfonic acid, compd. with 5-[[3-[2-chloro-4-(4,6-diamino-2,2-dimethyl-s-triazin-1(2H)-yl)phenoxy]propyl]carbamoyl]-o-toluenesulfonyl fluoride (1:1) (8CI)	-	-	416925
123491	L-Cysteine, S-[tris(4-methylphenyl)methyl]- (9CI)	-	-	556802
123493	L-Cysteine, S-[(4-fluorophenyl)diphenylmethyl]- (9CI)	-	-	556803
123516	Propylamine, 3-(2-chloro-4-nitrophenoxy)-, monohydrobromide	-	-	556813
123528	Alanine, 3-[(p-methoxy-.alpha.,.alpha.-diphenylbenzyl)thio]-, hydrate [4:1]	-	-	556816
123529	Alanine, 3-[(2-naphthyldiphenylmethyl)thio]-, L- (8CI)	-	-	556817
123794		-	-	416971
123814		-	-	416990
123829		-	-	417005
123976	Neriifolin	-	-	417054
123977	Card-20(22)-enolide, 3-[(6-deoxy-3-O-methyl-D-galactopyranosyl)oxy]-11,14-dihydroxy-, (3.beta.,11.alpha.)- (9CI)	-	-	417055
123978	Sarveroside	-	-	417056
123979	Thevetin	-	-	417057
123994	4,5,6,7-tetrachloro-3,3-bis(6-hydroxybiphenyl-3-yl)isobenzofuran-1(3H)-one	-	-	417065
124147	Alkaloid C from Cephalotaxus	-	Unknown	417172
124202		-	-	417199
124463	2-Fluoro ARA-A (9-.alpha.-D)	-	Unknown	417267
124749		-	-	417412
124764	Methanesulfonic acid, thio-, S-hexadecyl ester (8CI)	-	Unknown	417425
124770	p-Toluenesulfonic acid, thio-, S-decyl ester	-	Unknown	417429
124784		-	Unknown	417440
124994	Naphthalen-1,4-dione, 3-butanoylamino-2-chloro-1,4-dihydro-	-	Unknown	417510
125034	2,2'-disulfanediyldiquinolin-8-ol	-	-	417534
125066	Bleomycin	FDA approved	Db	301184
125176	Mikamycin, B grade	-	Unknown	417581
125201		-	-	417601
125347		-	-	417716
125511		-	-	417841
125541		-	-	417869
125552		-	-	417880
125844		-	-	418103
125845		-	-	418104
125973	Benzenepropanoic acid, .beta.-(benzoylamino)- .alpha.-hydroxy-, 6,12b-bis(acetyl oxy)-12-(benzoyloxy)- 2a,3,4,4a,5,6,9,10,11,12,12a,12b,- dodecahydro-4,11- dihydroxy-4a,8,13,13-tetramethyl-5-oxo- 7,1	FDA approved	Tu	418145
126217	L-Cysteine, S-[(4-bromophenyl)diphenylmethyl]- (9CI)	-	-	557115
126228	Ethanesulfonic acid, compd. with m-[4-[m-(4,6-diamino-2,2-dimethyl-s-triazin-1(2H)-yl)phenyl]butyl]benzenesulfonyl fluoride (1:1)	-	-	418249
126668		-	-	418607
126710		-	-	557204
126727	.beta.-Peltatin, 3'-demethoxy-O-methyl-	-	-	557208
126728	Antibiotic 379Y	-	-	301187
126765	B633407K028	-	-	418675
126771	Dichloroallyl Lawsone			418677
126849	3-Deazauridine	-	-	418741
126933		-	-	418811
127128		-	-	418983
127130		-	-	418985
127140		-	-	418994
127157		-	-	419008
127328	Guanidine, 1-(4-chloro-.alpha.,.alpha.,.alpha.-trifluoro-m-tolyl)-3-[4-[[2-(diisopropylamino)ethyl]amino]-6-methyl-2-pyrimidinyl]-	-	-	419066
127442	Flavacol	-	-	419111
127444	Aspergillic acid, dehydrodeoxy-	-	-	419113
127445	Aspergillic acid, hydroxy-	-	-	419114
127712		-	-	419296
127716	Decitabine	FDA approved	DNMT	419300
127752	6,6-dimethyl-1-(3-phenethylphenyl)-1,6-dihydro-1,3,5-triazine-2,4-diamine, hydrochloride	-	-	557305
127753	s-Triazine, 4,6-diamino-1,2-dihydro-2,2-dimethyl-1-(p-phenethylphenyl)-, monohydrochloride	-	Unknown	557306
127755	Benzenesulfonyl fluoride, 3-chloro-4-[4-[2-chloro-4-(4,6-diamino-2,2-dimethyl-1,3,5-triazin-1(2H)-yl)phenyl]butyl]-, monoethanesulfonate (9CI)	-	-	419326
127763	Propanamide, 2,3-dichloro-N-(9,10-dihydro-9,10-dioxo-1-anthracenyl)- (9CI)	-	-	419327
127923	Guanidine, [[p-fluoro-.alpha.-(.alpha.,.alpha.,.alpha.-trifluoro-p-tolyl)benzylidene]amino]-, monohydrochloride (8CI)	-	Unknown	557331
128177		-	-	419580
128184		-	-	557370
128206		-	-	419603
128280	Aracytidine 5'-O-phenylphosphate	-	Unknown	419674
128305	Flavone, 5,7-dihydroxy-3',4'-dimethoxy- (8CI)	-	-	419697
128571	Benzenesulfonyl fluoride, 2-chloro-5-[4-[2-chloro-4-(4,6-diamino-2,2-dimethyl-1,3,5-triazin-1(2H)-yl)phenyl]butyl]-, monoethanesulfonate (9CI)	-	-	419815
128635		-	-	419867
128687	6H-Furo[2',3',4,5]oxazolo[3,2-a]pyrimidine-2-methanol, 6-imino-2,3,3a,9a-tetrahydro-3-hydroxy-, 3-(dihydrogen phosphate) (8CI)	-	-	419896
128832		-	Unknown	420026
128877	[1]Benzothieno[3,2-h]isoquinoline	-	-	420061
128887	Benzenebutanamide, N-(phenylmethyl)-4-bis(2-chloro- ethyl)amino]-	-	-	420070
128895		-	-	420078
128981		-	-	420156
129152	Hygrophylline	-	-	420171
129185	Mycophenolic Acid	-	Unknown	420202
129220	Cyclo-C	-	-	420222
129266		-	-	420257
129408	Terephthalodihydroxamic acid	-	-	420299
129409	2,4-Pyrimidinediamine, 5-(1,3-benzodioxol-5-ylmethyl)- (9CI)	-	-	420300
129414	(.+-.)-2,3-Dehydroemetine dihydrochloride	-	-	557491
129518	Cyclopyrethrosin	-	Unknown	420387
129585		-	-	420433
129757		-	-	557568
129790		-	-	420515
129794	Ethanesulfonic acid, compd. with 2-chloro-5-[4-[m-(4,6-diamino-2,2-dimethyl-s-triazin-1(2H)-yl)phenyl]butyl]benzenesulfonyl fluoride (1:1)	-	-	420519
129922		-	-	420618
129925		-	-	420619
129943	Razoxane	-	-	301190
129957		-	-	420640
130227		-	-	420733
130279	7H-v-Triazolo[4,5-d]pyrimidin-7-one, 3,6-dihydro-3-.beta.-D-ribofuranosyl- (8CI)	-	-	420768
130785		-	-	420835
130789		-	-	420839
130796	7,7'-methylenebis(5-nitroquinolin-8-ol)	-	-	420843
130801	2-{[(6-Methoxyquinolin-8-yl)amino]methyl}phenol	-	-	420847
130813	4-(6-chloro-2-methoxyacridin-9-ylamino)-2-((4-methylpiperazin-1-yl)methyl)phenol, dihydrochloride	-	-	557695
130830		-	-	420864
130862		-	-	420887
130876		-	-	420897
131020		-	-	421004
131053	Phenothiazin-3-ol, 8-chloro-10-[3-(dimethylamino)propyl]- (8CI)	-	-	421032
131064		-	-	421036
131184		-	-	421149
131233	Cyclopentanone, 2,5-bis[(dimethylamino)methyl]-, dihydrochloride	-	Unknown	557781
131238		-	-	421188
131250		-	-	421200
131257		-	-	421207
131258		-	-	421208
131261		-	-	421210
131262		-	-	421211
131263		-	-	421212
131530		-	-	421432
131547	Marckine	-	Unknown	421449
131734		-	-	421593
131888		-	-	421638
131919		-	-	421669
131943	Benzamide, 4-nitro-N-[(phenylamino)thioxomethyl]- (9CI)	-	-	421692
131977	Carbanilide, N-benzylthio- (8CI)	-	-	421726
132230		-	-	421860
132275	Ethanesulfonic acid, compd. with 2-(2-chloro-4-(4,6-diamino-2,2-dimethyl-s-triazin-1(2H)-yl)phenoxy)acetanilide (1:1)	-	-	421887
[truncated: 17,954 more rows]
